# Supplementary material for: ESCRTs function directly on the lysosome membrane to downregulate ubiquitinated lysosomal membrane proteins
Source: eLife. 2017 Jun 29;6:e26403. doi: 10.7554/eLife.26403 (PMC5507667; doi:10.7554/eLife.26403)
Supplement: Supplementary file 1. — DOI: http://dx.doi.org/10.7554/eLife.26403.019 [file elife-26403-supp1.xlsx]

## Sheet: Fold change of each mutant
	Plate #	Row	Column	Mutant Name	Fold change in fluorescence intensity		Heat map for fold change of fluorescence intensity
							fold change			1	2	3	4	5
										1	2	3	4	5
A04	1	A	4	0	2.11811
A05	1	A	5	0	1.95384
A06	1	A	6	GDH3	1.72407
A07	1	A	7	BDH2	1.56709			H	G	F	E	D	C	B	A
A08	1	A	8	BDH1	1.73395		1		1.07118	1.16033	1.35776	1.2101	1.30445
A09	1	A	9	ECM1	1.86234		2	6.92439	1.71017	1.27685	1.33008	1.68616	2.10731	1.73454
A10	1	A	10	CNE1	1.50053		3	1	1.23986	1.24944	2.89906	1.2808	1.47212	1.68771
A11	1	A	11	GPB2	1.73986		4		1.21771	1.31191	1.82624	1.33755	1.5805	1.92768	2.11811
B02	1	B	2	OAF1	1.73454		5	1.04409	1.14627	1.18136	1.18113	1.30242	1.59132	1.78361	1.95384
B03	1	B	3	AIM2	1.68771		6	1.81471	1.17181	1.01667	1.41843	1.15911	1.40557	1.44061	1.72407
B04	1	B	4	GEM1	1.92768		7	1.47955	1.40416		1.98541	1.27848	1.34876	1.78346	1.56709
B05	1	B	5	AIM1	1.78361		8	1.18976	1.33523	1.07385	1.30724	2.37469	1.52939	1.69126	1.73395
B06	1	B	6	0	1.44061		9	1.14253	1.21589	1.11209	1.49039	1.46943	1.56405	1.64437	1.86234
B07	1	B	7	GCV3	1.78346		10		1.12661	1.38958	1.418	1.34607	1.58228	1.43612	1.50053
B08	1	B	8	ERV46	1.69126		11	1.29754	1.6818	1.33956	1.73709	1.24943	1.22818	1.29676	1.73986
B09	1	B	9	nA	1.64437		12	1.82543	1.55422	2.23278	1.32587	1.20435	1.60995
B10	1	B	10	CLN3	1.43612
B11	1	B	11	CYC3	1.29676
C01	1	C	1	RBG1	1.30445
C02	1	C	2	FUN12	2.10731
C03	1	C	3	FUN19	1.47212
C04	1	C	4	GIP4	1.5805
C05	1	C	5	SNC1	1.59132
C06	1	C	6	MYO4	1.40557
C07	1	C	7	FRT2	1.34876
C08	1	C	8	SAW1	1.52939
C09	1	C	9	DRS2	1.56405
C10	1	C	10	PMT2	1.58228
C11	1	C	11	FUN26	1.22818
C12	1	C	12	CCR4	1.60995
D01	1	D	1	ATS1	1.2101
D02	1	D	2	FUN30	1.68616
D03	1	D	3	LDS1	1.2808
D04	1	D	4	PSK1	1.33755
D05	1	D	5	NTG1	1.30242
D06	1	D	6	SYN8	1.15911
D07	1	D	7	DEP1	1.27848
D08	1	D	8	SWC3	2.37469
D09	1	D	9	MDM10	1.46943
D10	1	D	10	SPO7	1.34607
D11	1	D	11	FUN14	1.24943
D12	1	D	12	ERP2	1.20435
E01	1	E	1	0	1.35776
E02	1	E	2	SSA1	1.33008
E03	1	E	3	VPS8	5.02197
E04	1	E	4	NUP60	1.82624
E05	1	E	5	SWD1	1.18113
E06	1	E	6	BUD14	1.41843
E07	1	E	7	ADE1	1.98541
E08	1	E	8	KIN3	1.30724
E09	1	E	9	PAU7	1.49039
E10	1	E	10	0	1.418
E11	1	E	11	UIP3	1.73709
E12	1	E	12	0	1.32587
F01	1	F	1	0	1.16033
F02	1	F	2	PRM9	1.27685
F03	1	F	3	0	1.24944
F04	1	F	4	YAT1	1.31191
F05	1	F	5	nA	1.18136
F06	1	F	6	nA	1.01667
F08	1	F	8	nA	1.07385
F09	1	F	9	nA	1.11209
F10	1	F	10	0	1.38958
F11	1	F	11	DNM1	1.33956
F12	1	F	12	RTT109	2.23278
G01	1	G	1	SPO75	1.07118
G02	1	G	2	MMM1	1.71017
G03	1	G	3	COX17	1.23986
G04	1	G	4	PSR1	1.21771
G05	1	G	5	YEH1	1.14627
G06	1	G	6	PUF3	1.17181
G07	1	G	7	EMC6	1.40416
G08	1	G	8	BPT1	1.33523
G09	1	G	9	nA	1.21589
G10	1	G	10	nA	1.12661
G11	1	G	11	KNS1	1.6818
G12	1	G	12	0	1.55422
H02	1	H	2	SSH4	6.92439
H03	1	H	3	WT	1
H05	1	H	5	PAU17	1.04409
H06	1	H	6	HSP104	1.81471
H07	1	H	7	TPO1	1.47955
H08	1	H	8	FRA1	1.18976
H09	1	H	9	0	1.14253
H11	1	H	11	ENT4	1.29754
H12	1	H	12	UBI4	1.82543
A01	2	A	1	VPS13	2.32181			H	G	F	E	D	C	B	A
A03	2	A	3	SDH2	2.26686		1	1.1301	1.50519	2.15451	1.38497	7.97226	1.50818	1.86641	2.32181
A04	2	A	4	ATG10	1.83059		2	6.85485	1.4748	1.62207	2.61366		1.61309	1.77003
A05	2	A	5	FPS1	3.44894		3	1.29981	1.2842	1.27659	1.30287	1.67266	1.62428	1.76411	2.26686
A06	2	A	6	RPL8B	1.84158		4	1.23032	1.35577	1.37877	1.62734	1.49776	2.02495	1.83954	1.83059
A07	2	A	7	RNP1	2.4961		5	1.2017	1.74718	2.25433	1.63364	1.65357	1.79154	1.92098	3.44894
A08	2	A	8	0	2.0759		6	1.34192	1.34731	1.34772	1.85757	1.47833	1.59158	1.88024	1.84158
A09	2	A	9	FRE6	1.88504		7	1.35727	0.999698	1.87804	1.80552	1.40422	1.4658	1.79687	2.4961
A10	2	A	10	AQY2	1.78057		8	1.4175	1.35598	1.63435	1.5925	2.28406	1.98457	1.91419	2.0759
A11	2	A	11	0	1.84308		9	1.53166	1.45322	1.64059	1.53223	2.29802	1.96951	2.01448	1.88504
A12	2	A	12	0	1.88876		10	1.32604	1.29955	1.46473	1.87479	1.76341	2.19573	2.27051	1.78057
B01	2	B	1	YCT1	1.86641		11	1.88272	1.40231	1.69106	1.83409	1.61466	1.72681	1.83054	1.84308
B02	2	B	2	0	1.77003		12	1.69575	1.23258	1.25142	2.08791	1.7217	1.76363	1.74602	1.88876
B03	2	B	3	JLP1	1.76411
B04	2	B	4	0	1.83954
B05	2	B	5	GTT2	1.92098
B06	2	B	6	MMP1	1.88024
B07	2	B	7	MHT1	1.79687
B08	2	B	8	AYT1	1.91419
B09	2	B	9	0	2.01448
B10	2	B	10	CMS1	2.27051
B11	2	B	11	THI73	1.83054
B12	2	B	12	LOT6	1.74602
C01	2	C	1	0	1.50818
C02	2	C	2	GAT3	1.61309
C03	2	C	3	PPR1	1.62428
C04	2	C	4	BRE2	2.02495
C05	2	C	5	PML1	1.79154
C06	2	C	6	MEU1	1.59158
C07	2	C	7	POM34	1.4658
C08	2	C	8	PSR2	1.98457
C09	2	C	9	YEH2	1.96951
C10	2	C	10	IRC25	2.19573
C11	2	C	11	IZH3	1.72681
C12	2	C	12	UBR2	1.76363
D01	2	D	1	SNF7	7.97226
D03	2	D	3	ADE16	1.67266
D04	2	D	4	0	1.49776
D05	2	D	5	TRX1	1.65357
D06	2	D	6	PDC1	1.47833
D07	2	D	7	0	1.40422
D08	2	D	8	FRE8	2.28406
D09	2	D	9	RPS0B	2.29802
D10	2	D	10	0	1.76341
D11	2	D	11	0	1.61466
D12	2	D	12	OSW2	1.7217
E01	2	E	1	SPT8	1.38497
E02	2	E	2	ERG3	2.61366
E03	2	E	3	MNL2	1.30287
E04	2	E	4	SHM2	1.62734
E05	2	E	5	REX2	1.63364
E06	2	E	6	RPL22A	1.85757
E07	2	E	7	BUD28	1.80552
E08	2	E	8	BMT6	1.5925
E09	2	E	9	PER33	1.53223
E10	2	E	10	ENV10	1.87479
E11	2	E	11	PET309	1.83409
E12	2	E	12	FYV7	2.08791
F01	2	F	1	MEF1	2.15451
F02	2	F	2	XYL2	1.62207
F03	2	F	3	0	1.27659
F04	2	F	4	RFU1	1.37877
F05	2	F	5	BUD20	2.25433
F06	2	F	6	FMP25	1.34772
F07	2	F	7	SIC1	1.87804
F08	2	F	8	EMP46	1.63435
F09	2	F	9	GAL2	1.64059
F10	2	F	10	SRL2	1.46473
F11	2	F	11	EMP70	1.69106
F12	2	F	12	RAX2	1.25142
G01	2	G	1	ARP6	1.50519
G02	2	G	2	CSF1	1.4748
G03	2	G	3	ALT1	1.2842
G04	2	G	4	XDJ1	1.35577
G05	2	G	5	GEP5	1.74718
G06	2	G	6	SUL2	1.34731
G07	2	G	7	WT	1
G08	2	G	8	GIS3	1.35598
G09	2	G	9	IOC2	1.45322
G10	2	G	10	KIN2	1.29955
G11	2	G	11	HRT3	1.40231
G12	2	G	12	CHA4	1.23258
H01	2	H	1	ICT1	1.1301
H02	2	H	2	SSH4	6.85485
H03	2	H	3	APC9	1.29981
H04	2	H	4	LCL2	1.23032
H05	2	H	5	REX3	1.2017
H06	2	H	6	0	1.34192
H07	2	H	7	AHP1	1.35727
H08	2	H	8	0	1.4175
H09	2	H	9	0	1.53166
H10	2	H	10	HOG1	1.32604
H11	2	H	11	AVL9	1.88272
H12	2	H	12	0	1.69575
A01	3	A	1	SRN2/vps37	5.92943			H	G	F	E	D	C	B	A
A02	3	A	2	YPS1	1.80286		1	1.87413	1.26692	1.4825	1.42419	1.51085	1.43931	1.50067	5.92943
A03					1.83769		2	7.44579	1.21458	1.2341	1.30865	1.43843	1.40927	1.54305	1.80286
A04	3	A	4	YPS3	1.8713		3	1.68358	1.2428	1.26928	1.60871	1.45582	1.63668	1.51901
A05	3	A	5	0	1.86019		4	1.09338	1.34735	1.25293	1.28184	1.51696	1.50732	1.66563	1.8713
A06	3	A	6	0	1.64829		5	1.29163	1.20004	1.2654	2.05247	1.45678	1.61536	1.62145	1.86019
A07	3	A	7	0	1.60934		6	1.10513	1.17849	2.79398	1.55599	1.51289	1.39033	1.35635	1.64829
A08	3	A	8	0	1.51572		7	1.22584	1.12415	1.16897	2.10606	1.45808	1.16876	1.53805	1.60934
A09	3	A	9	0	1.58861		8	1.2532	1.24295	1.26702	1.32126	1.35295	1.34259	1.5103	1.51572
A10	3	A	10	UFO1	1.57301		9	1.43657	1.19579	1.09651	1.22406	1.36916	1.20482	1.59927	1.58861
A11	3	A	11	AIM33	1.30657		10	1.24582	1.14145	1.2174	1.20171	1.25981	1.22578	1.41466	1.57301
A12	3	A	12	ALO1	1.32136		11	1.4118	1.44443	1.12079	1.23864	1.99332	1.0951	1.27626	1.30657
B01	3	B	1	0	1.50067		12	1.02163	1.04118	0.999192	1.06969	1.10566	1.20244	1.25087	1.32136
B02	3	B	2	0	1.54305
B03	3	B	3	0	1.51901
B04	3	B	4	TDA9	1.66563
B05	3	B	5	DUS1	1.62145
B06	3	B	6	0	1.35635
B07	3	B	7	CPR3	1.53805
B08	3	B	8	RPS1B	1.5103
B09	3	B	9	MFT1	1.59927
B10	3	B	10	PIF1	1.41466
B11	3	B	11	OGG1	1.27626
B12	3	B	12	NTE1	1.25087
C01	3	C	1	SML1	1.43931
C02	3	C	2	CMP2	1.40927
C03	3	C	3	nA	1.63668
C04	3	C	4	IMD4	1.50732
C05	3	C	5	SPC2	1.61536
C06	3	C	6	CYB2	1.39033
C07	3	C	7	0	1.16876
C08	3	C	8	SUR7	1.34259
C09	3	C	9	GAL80	1.20482
C10	3	C	10	AIM32	1.22578
C11	3	C	11	GSF2	1.0951
C12	3	C	12	nA	1.20244
D01	3	D	1	0	1.51085
D02	3	D	2	AMD1	1.43843
D03	3	D	3	SRC1	1.45582
D04	3	D	4	nA	1.51696
D05	3	D	5	nA	1.45678
D06	3	D	6	RAD52	1.51289
D07	3	D	7	RCF1	1.45808
D08	3	D	8	USA1	1.35295
D09	3	D	9	TSA1	1.36916
D10	3	D	10	RPS18B	1.25981
D11	3	D	11	RPS17A	1.99332
D12	3	D	12	0	1.10566
E01	3	E	1	OST6	1.42419
E02	3	E	2	0	1.30865
E03	3	E	3	PSP2	1.60871
E04	3	E	4	PPZ1	1.28184
E05	3	E	5	TRM9	2.05247
E06	3	E	6	UBX2	1.55599
E07	3	E	7	nA	2.10606
E08	3	E	8	ERV25	1.32126
E09	3	E	9	RAD33	1.22406
E10	3	E	10	MRPL39	1.20171
E11	3	E	11	ERG6	1.23864
E12	3	E	12	YAP1	1.06969
F01	3	F	1	GIS4	1.4825
F02	3	F	2	TRM12	1.2341
F03	3	F	3	GLO1	1.26928
F04	3	F	4	0	1.25293
F05	3	F	5	0	1.2654
F06	3	F	6	YPT7	2.79398
F07	3	F	7	MIX17	1.16897
F08	3	F	8	AIM34	1.26702
F09	3	F	9	PLB2	1.09651
F10	3	F	10	0	1.2174
F11	3	F	11	PLB1	1.12079
F12	3	F	12	WT	1
G01	3	G	1	0	1.26692
G02	3	G	2	HXT2	1.21458
G03	3	G	3	CLU1	1.2428
G04	3	G	4	BUD22	1.34735
G05	3	G	5	ERG5	1.20004
G06	3	G	6	SOK2	1.17849
G07	3	G	7	SPO20	1.12415
G08	3	G	8	0	1.24295
G09	3	G	9	STB4	1.19579
G10	3	G	10	FMS1	1.14145
G11	3	G	11	MAC1	1.44443
G12	3	G	12	UBC7	1.04118
H01	3	H	1	MSS1	1.87413
H02	3	H	2	SSH4	7.44579
H03	3	H	3	MRPL3	1.68358
H04	3	H	4	CSI1	1.09338
H05	3	H	5	PEX12	1.29163
H06	3	H	6	0	1.10513
H07	3	H	7	FAR8	1.22584
H08	3	H	8	RSF1	1.2532
H09	3	H	9	0	1.43657
H10	3	H	10	EIS1	1.24582
H11	3	H	11	HOF1	1.4118
H12	3	H	12	0	1.02163
A01	4	A	1	IMP2	2.45799			H	G	F	E	D	C	B	A
A02	4	A	2	MIH1	2.0751		1	1.33554	1.23102	1.41078	1.40736	1.52937	1.67448	2.05701	2.45799
A03	4	A	3	SUB1	3.19451		2	2.49083	1.83233	1.42543	1.48283	1.55127	1.74102	1.79684	2.0751
A05	4	A	5	YET2	1.81365		3	1.00028	1.80528	1.44238	1.47365	1.57906	1.4941	1.74389	3.19451
A06	4	A	6	ARA2	1.90149		4	1.44663	1.40705	1.47378	1.49885	1.68106	1.75361	2.99182
A07	4	A	7	ARG80	1.82116		5	1.30863	2.15069	1.70299	1.43741	3.12648	1.50894	3.25786	1.81365
A08	4	A	8	IOC4	1.86188		6	1.69703	1.35224	1.39875	1.39556	1.50146	1.70516	1.80094	1.90149
A09	4	A	9	SIP5	2.12262		7	1.60597	6.59993	1.52998	1.42965	1.42997	1.96313	1.76969	1.82116
A10	4	A	10	0	1.75764		8	1.31594	1.42347	1.44911	1.64415	2.37655	1.56665	1.76406	1.86188
A11	4	A	11	RPS16A	2.45972		9	1.44833	1.43392	1.87717	1.53653	4.45495	1.63753	1.66571	2.12262
A12	4	A	12	0	1.62802		10	1.45191	1.51613	1.5438	2.01649	1.66354	1.67911	1.83061	1.75764
B01	4	B	1	NDE1	2.05701		11	1.39677	1.4974	1.78193	1.65642	1.5667	1.68861	1.79358	2.45972
B02	4	B	2	0	1.79684		12	1.41427	1.53368	1.32128	1.60705	1.46602	1.39076	1.99719	1.62802
B03	4	B	3	OSW5	1.74389
B04	4	B	4	YIM2	2.99182
B05	4	B	5	IMP1	3.25786
B06	4	B	6	YIM1	1.80094
B07	4	B	7	NUP53	1.76969
B08	4	B	8	0	1.76406
B09	4	B	9	0	1.66571
B10	4	B	10	TPP1	1.83061
B11	4	B	11	AIM36	1.79358
B12	4	B	12	nA	1.99719
C01	4	C	1	ATG16	1.67448
C02	4	C	2	HLJ1	1.74102
C03	4	C	3	DNF3	1.4941
C04	4	C	4	INP2	1.75361
C05	4	C	5	MSS11	1.50894
C06	4	C	6	MME1	1.70516
C07	4	C	7	MLH1	1.96313
C08	4	C	8	ALD3	1.56665
C09	4	C	9	ALD2	1.63753
C10	4	C	10	0	1.67911
C11	4	C	11	0	1.68861
C12	4	C	12	PAI3	1.39076
D01	4	D	1	SIP18	1.52937
D02	4	D	2	ECM5	1.55127
D03	4	D	3	MMT1	1.57906
D04	4	D	4	0	1.68106
D05	4	D	5	SPT21	3.12648
D06	4	D	6	CTL1	1.50146
D07	4	D	7	RGM1	1.42997
D08	4	D	8	SSO2	2.37655
D09	4	D	9	ADD37	4.45495
D10	4	D	10	HSC82	1.66354
D11	4	D	11	0	1.5667
D12	4	D	12	MRPS17	1.46602
E01	4	E	1	GCV2	1.40736
E02	4	E	2	SGS1	1.48283
E03	4	E	3	SPG5	1.47365
E04	4	E	4	GYL1	1.49885
E05	4	E	5	MRPL24	1.43741
E06	4	E	6	RPL36A	1.39556
E07	4	E	7	0	1.42965
E08	4	E	8	ICY1	1.64415
E09	4	E	9	0	1.53653
E10	4	E	10	CIK1	2.01649
E11	4	E	11	CLN1	1.65642
E12	4	E	12	RAD14	1.60705
F01	4	F	1	ERG2	1.41078
F02	4	F	2	INP1	1.42543
F03	4	F	3	PFK2	1.44238
F04	4	F	4	0	1.47378
F05	4	F	5	HFA1	1.70299
F06	4	F	6	0	1.39875
F07	4	F	7	SCJ1	1.52998
F08	4	F	8	GAS3	1.44911
F09	4	F	9	SKY1	1.87717
F10	4	F	10	ESC1	1.5438
F11	4	F	11	0	1.78193
F12	4	F	12	FSH2	1.32128
G01	4	G	1	UBP8	1.23102
G02	4	G	2	MRE11	1.83233
G03	4	G	3	MRPL44	1.80528
G04	4	G	4	0	1.40705
G05	4	G	5	MTF1	2.15069
G06	4	G	6	RPS10B	1.35224
G07	4	G	7	PEP5/VPS11	6.59993
G08	4	G	8	FUS2	1.42347
G09	4	G	9	TRI1	1.43392
G10	4	G	10	RNH1	1.51613
G11	4	G	11	BCH1	1.4974
G12	4	G	12	DFG5	1.53368
H01	4	H	1	YHM2	1.33554
H02	4	H	1	0	2.49083
H03	4	H	3	WT	1
H04	4	H	4	ZRC1	1.44663
H05	4	H	5	0	1.30863
H06	4	H	6	0	1.69703
H07	4	H	7	COA6	1.60597
H08	4	H	8	FAA4	1.31594
H09	4	H	9	RKR1	1.44833
H10	4	H	10	GAD1	1.45191
H11	4	H	11	GTO3	1.39677
H12	4	H	12	HOR7	1.41427
A01	5	A	1	0	1.52939			H	G	F	E	D	C	B	A
A02	5	A	2	0	1.65616		1	1	1.17006	1.1976	1.20696	1.2881	1.43986	1.57714	1.52939
A03	5	A	3	0	1.5251		2	1.39714	1.23216	1.20278	1.30646	1.34565	1.47301	1.63949	1.65616
A04	5	A	4	GFD1	1.46726		3	1.3985	1.18053	1.54709	1.21411	2.14214	1.37376	1.52888	1.5251
A06	5	A	6	COX7	1.65267		4	1.28666	1.45386	1.24309	1.36019	4.10042	1.33154	1.56907	1.46726
A07	5	A	7	PET111	2.11755		5	1.03822	1.13398	1.23173	1.25221	1.32194	2.55211	1.62235	1.81365
A08	5	A	8	ROY1	1.55283		6	1.04029	1.19181	1.0803	1.0729	1.07797	1.36266	2.33101	1.65267
A09	5	A	9	TRM732	1.54442		7	1.10787	1.47936	1.02266	1.20442	1.61614	1.30278	1.56101	2.11755
A10	5	A	10	TPS3	1.44603		8	1.07928	1.12661	1.10546	1.3011	1.39419	1.32787	1.50222	1.55283
A11	5	A	11	0	1.36078		9	1.21499	1.97451	1.14899	1.3529	1.3276	1.29022	1.40226	1.54442
A12	5	A	12	SLM2	1.33208		10	1.0899	1.11821	1.15646	1.16502	1.2004	2.10642	1.32933	1.44603
B01	5	B	1	CUE1	1.57714		11	1.12091	1.12352	1.24813	1.37958	2.83558	2.25549	1.24267	1.36078
B02	5	B	2	0	1.63949		12	1.06211	1.13419	1.06811	1.00061	1.12418	1.13278	1.29576	1.33208
B03	5	B	3	RSN1	1.52888
B04	5	B	4	PPA2	1.56907
B05	5	B	5	TMA23	1.62235
B06	5	B	6	SCS7	2.33101
B07	5	B	7	ZDS1	1.56101
B08	5	B	8	RCE1	1.50222
B09	5	B	9	BUL1	1.40226
B10	5	B	10	DSK2	1.32933
B11	5	B	11	PRM15	1.24267
B12	5	B	12	CAT8	1.29576
C01	5	C	1	AEP2	1.43986
C02	5	C	2	RIT1	1.47301
C03	5	C	3	YKU70	1.37376
C04	5	C	4	NGL2	1.33154
C05	5	C	5	MRPL33	2.55211
C06	5	C	6	DSS1	1.36266
C07	5	C	7	ABZ2	1.30278
C08	5	C	8	TDA1	1.32787
C09	5	C	9	GOT1	1.29022
C10	5	C	10	HER2	2.10642
C11	5	C	11	JNM1	2.25549
C12	5	C	12	0	1.13278
D01	5	D	1	0	1.2881
D02	5	D	2	PRC1	1.34565
D03	5	D	3	DYN3	2.14214
D04	5	D	4	ADE4	4.10042
D05	5	D	5	YME2	1.32194
D06	5	D	6	ADH2	1.07797
D07	5	D	7	UBP15	1.61614
D08	5	D	8	0	1.39419
D09	5	D	9	SCW10	1.3276
D10	5	D	10	0	1.2004
D11	5	D	11	GAS1	2.83558
D12	5	D	12	0	1.12418
E01	5	E	1	YRF1-6	1.20696
E02	5	E	2	0	1.30646
E03	5	E	3	COS1	1.21411
E04	5	E	4	DDI3	1.36019
E05	5	E	5	SNO2	1.25221
E06	5	E	6	SNZ2	1.0729
E07	5	E	7	THI12	1.20442
E08	5	E	8	RPD3	1.3011
E09	5	E	9	PEX6	1.3529
E10	5	E	10	MDJ2	1.16502
E11	5	E	11	EGT2	1.37958
E12	5	E	12	PFA3	1.00061
F01	5	F	1	0	1.1976
F02	5	F	2	FIG4	1.20278
F03	5	F	3	LEM3	1.54709
F04	5	F	4	KRE1	1.24309
F05	5	F	5	VNX1	1.23173
F06	5	F	6	0	1.0803
F07	5	F	7	0	1.02266
F08	5	F	8	HXT14	1.10546
F09	5	F	9	DAL82	1.14899
F10	5	F	10	SKP2	1.15646
F11	5	F	11	STB1	1.24813
F12	5	F	12	MSG5	1.06811
G01	5	G	1	BXI1	1.17006
G02	5	G	2	YPT11	1.23216
G03	5	G	3	0	1.18053
G04	5	G	4	RPS19B	1.45386
G05	5	G	5	RPL18B	1.13398
G06	5	G	6	TRF5	1.19181
G07	5	G	7	CLA4	1.47936
G08	5	G	8	SNN1	1.12661
G09	5	G	9	MON2	1.97451
G10	5	G	10	MRX6	1.11821
G11	5	G	11	RIM21	1.12352
G12	5	G	12	MSB3	1.13419
H01	5	H	1	WT	1
H02	5	H	2	0	1.39714
H03	5	H	3	MID1	1.3985
H04	5	H	4	PCL1	1.28666
H05	5	H	5	CAF40	1.03822
H06	5	H	6	CUS2	1.04029
H07	5	H	7	0	1.10787
H08	5	H	8	WSC2	1.07928
H09	5	H	9	HCH1	1.21499
H10	5	H	10	ERG24	1.0899
H11	5	H	11	CAF120	1.12091
H12	5	H	12	RPS7B	1.06211
A01	6	A	1	0	1.69665			H	G	F	E	D	C	B	A
A02	6	A	2	BOR1	1.3743		1	1.09831	1	1.08766	1.17541	1.16425	1.70992	1.44231	1.69665
A03	6	A	3	TOF1	1.64783		2	1.30637	1.14549	1.08258	1.28774	1.33392	2.2182	1.51374	1.3743
A04	6	A	4	BNI1	2.42124		3	1.05892	1.27549	1.21128	1.26103	1.4117	1.42161	1.48002	1.64783
A05	6	A	5	ALP1	1.55502		4	1.15681	2.28917	1.27498	1.44185	1.34552	1.40116	1.4547	2.42124
A07	6	A	7	BSC4	1.50684		5	1.18098	1.36069	1.20144	8.25531	1.31586	1.44095	1.44448	1.55502
A08	6	A	8	LYP1	1.53339		6	1.0562	1.25292	1.19854	1.42602	1.25811	1.40775	1.68356	1.65267
A09	6	A	9	0	0.718539		7	1.08453	1.46944	1.25464	1.25687	1.953	1.48631	2.3677	1.50684
A10	6	A	10	IST1	1.35571		8	1.07125	1.51355	1.28019	1.32518	1.43379	1.79032	1.9831	1.53339
A11	6	A	11	PDR17	1.91941		9	1.21665	1.66605	1.17849	1.2577	1.37095	1.31265	1.86433	0.718539
A12	6	A	12	ATX1	1.23912		10	1.35055	1.21022	1.1291	1.23088	1.22307	1.26156	1.40411	1.35571
B01	6	B	1	SIP3	1.44231		11	1.13915	1.11992	1.4399	1.2175	1.28615	1.2666	1.26952	1.91941
B02	6	B	2	GIS2	1.51374		12	1.06836	1.7864	1.03884	1.21162	1.16058	1.14748	1.27647	1.23912
B03	6	B	3	RTC4	1.48002
B04	6	B	4	TEX1	1.4547
B05	6	B	5	MPA43	1.44448
B06	6	B	6	RPA49	1.68356
B07	6	B	7	VPS75	2.3677
B08	6	B	8	RRP6	1.9831
B09	6	B	9	ALG6	1.86433
B10	6	B	10	YSP3	1.40411
B11	6	B	11	DNL4	1.26952
B12	6	B	12	TSR3	1.27647
C01	6	C	1	SGT2	1.70992
C02	6	C	2	SLG1	2.2182
C03	6	C	3	TIR4	1.42161
C04	6	C	4	TIR2	1.40116
C05	6	C	5	AUS1	1.44095
C06	6	C	6	0	1.40775
C07	6	C	7	IRC11	1.48631
C08	6	C	8	RTS1	1.79032
C09	6	C	9	0	1.31265
C10	6	C	10	ERP4	1.26156
C11	6	C	11	PET127	1.2666
C12	6	C	12	ROD1	1.14748
D01	6	D	1	0	1.16425
D02	6	D	2	SFM1	1.33392
D03	6	D	3	0	1.4117
D04	6	D	4	AHC1	1.34552
D05	6	D	5	0	1.31586
D06	6	D	6	HST3	1.25811
D07	6	D	7	BUB3	1.953
D08	6	D	8	STI1	1.43379
D09	6	D	9	CIN5	1.37095
D10	6	D	10	0	1.22307
D11	6	D	11	DFG16	1.28615
D12	6	D	12	nA	1.16058
E01	6	E	1	HMS1	1.17541
E02	6	E	2	EXO1	1.28774
E03	6	E	3	AKR2	1.26103
E04	6	E	4	SHE4	1.44185
E05	6	E	5	PEP12	8.25531
E06	6	E	6	CYC2	1.42602
E07	6	E	7	HIR2	1.25687
E08	6	E	8	CKB2	1.32518
E09	6	E	9	GLO4	1.2577
E10	6	E	10	0	1.23088
E11	6	E	11	CUE5	1.2175
E12	6	E	12	WHI2	1.21162
F01	6	F	1	IRC23	1.08766
F02	6	F	2	TOM6	1.08258
F03	6	F	3	STD1	1.21128
F04	6	F	4	RSB1	1.27498
F05	6	F	5	0	1.20144
F06	6	F	6	ETT1	1.19854
F07	6	F	7	TMC1	1.25464
F08	6	F	8	0	1.28019
F09	6	F	9	VHS3	1.17849
F10	6	F	10	0	1.1291
F11	6	F	11	ASE1	1.4399
F12	6	F	12	LPL1	1.03884
G01	6	G	1	WT	1
G02	6	G	2	0	1.14549
G03	6	G	3	YNG1	1.27549
G04	6	G	4	CYT1	2.28917
G05	6	G	5	MSA1	1.36069
G06	6	G	6	ALG8	1.25292
G07	6	G	7	VAM10	1.46944
G08	6	G	8	VPS5	1.51355
G09	6	G	9	GYP1	1.66605
G10	6	G	10	NRT1	1.21022
G11	6	G	11	0	1.11992
G12	6	G	12	SGO1	1.7864
H01	6	H	1	SKI7	1.09831
H02	6	H	2	0	1.30637
H03	6	H	3	BUD21	1.05892
H04	6	H	4	ATX2	1.15681
H05	6	H	5	DIA2	1.18098
H06	6	H	6	TGL5	1.0562
H07	6	H	7	0	1.08453
H08	6	H	8	WHI5	1.07125
H09	6	H	9	LPX1	1.21665
H10	6	H	10	OST3	1.35055
H11	6	H	11	TCB1	1.13915
H12	6	H	12	YVC1	1.06836
A01	7	A	1	nA	1.55459			H	G	F	E	D	C	B	A
A02	7	A	2	VPS21	1.89011		1	4.84085	1.07277	1.33758	1.82462	1.72885	1.27103	1.56413	1.55459
A03	7	A	3	PTC5	1.94418		2	9.11821	1.11784	1.24148	1.90752	2.32668	3.03367	1.9912	1.89011
A04	7	A	4	TMA46	2.95754		3	1.16447	1.19991	2.1871	1.60858	1.24579	2.99436	1.47815	1.94418
A05	7	A	5	ECM3	2.13722		4	1.7071	1.18619	1.32073	1.50787	1.78318	4.20788	2.56073	2.95754
A06	7	A	6	0	1.47714		5	1.31695	1.16113	1.41309	1.29224	2.29876	1.39831	1.46426	2.13722
A08	7	A	8	ARF3	1.66964		6	1	1.05495	1.09054	2.48318	1.31011		1.58629	1.47714
A09	7	A	9	0	1.43591		7	1.60151	1.17903	1.67521	1.21574	1.90872	1.26453	2.40337
A11	7	A	11	YPK9	1.48653		8	1.18906	1.72332	1.43815		1.32671	1.47603	2.87926	1.66964
A12	7	A	12	0	1.27097		9	1.14351	1.60656	1.16142	1.26721	1.53448	1.39848	3.49756	1.43591
B01	7	B	1	RPS10A	1.56413		10	1.31695	1.14717	2.39269	1.18416	1.64655	1.60005	1.32178
B02	7	B	2	UAF30	1.9912		11	1.1134	1.23868	1.27279	2.08789	1.34789	1.82047	1.47742	1.48653
B03	7	B	3	0	1.47815		12	1.70735	1.83413	1.15184	1.16057	1.28456		1.8436	1.27097
B04	7	B	4	TIM18	2.56073
B05	7	B	5	MUM3	1.46426
B06	7	B	6	BUD7	1.58629
B07	7	B	7	RAX1	2.40337
B08	7	B	8	0	2.87926
B09	7	B	9	CPA1	3.49756
B10	7	B	10	BIL1	1.32178
B11	7	B	11	ISW2	1.47742
B12	7	B	12	RRG7	1.8436
C01	7	C	1	SLY41	1.27103
C02	7	C	2	SNU66	3.03367
C03	7	C	3	DGK1	2.99436
C04	7	C	4	RPL20B	4.20788
C05	7	C	5	SPS4	1.39831
C07	7	C	7	SFG1	1.26453
C08	7	C	8	COT1	1.47603
C09	7	C	9	0	1.39848
C10	7	C	10	GNT1	1.60005
C11	7	C	11	PMT3	1.82047
D01	7	D	1	PRO2	1.72885
D02	7	D	2	FRT1	2.32668
D03	7	D	3	SNC2	1.24579
D04	7	D	4	PDR10	1.78318
D05	7	D	5	MIP1	2.29876
D06	7	D	6	VMA4	1.31011
D07	7	D	7	MRS2	1.90872
D08	7	D	8	TEA1	1.32671
D09	7	D	9	0	1.53448
D10	7	D	10	UBC11	1.64655
D11	7	D	11	0	1.34789
D12	7	D	12	0	1.28456
E01	7	E	1	TYE7	1.82462
E02	7	E	2	REV1	1.90752
E03	7	E	3	PYK2	1.60858
E04	7	E	4	PUT4	1.50787
E05	7	E	5	CIN1	1.29224
E06	7	E	6	MNE1	2.48318
E07	7	E	7	MEK1	1.21574
E09	7	E	9	MSC6	1.26721
E10	7	E	10	GDS1	1.18416
E11	7	E	11	CIR2	2.08789
E12	7	E	12	SNX3	1.16057
F01	7	F	1	HAP5	1.33758
F02	7	F	2	VTS1	1.24148
F03	7	F	3	PDE2	2.1871
F04	7	F	4	PIP2	1.32073
F05	7	F	5	0	1.41309
F06	7	F	6	SCP1	1.09054
F07	7	F	7	RAD17	1.67521
F08	7	F	8	GPB1	1.43815
F09	7	F	9	ALD4	1.16142
F10	7	F	10	GDH1	2.39269
F11	7	F	11	0	1.27279
F12	7	F	12	ATF1	1.15184
G01	7	G	1	AMF1	1.07277
G02	7	G	2	RDR1	1.11784
G03	7	G	3	FRE3	1.19991
G04	7	G	4	FIT2	1.18619
G05	7	G	5	FIT3	1.16113
G06	7	G	6	FRE5	1.05495
G07	7	G	7	0	1.17903
G08	7	G	8	PHR1	1.72332
G09	7	G	9	PHO80	1.60656
G10	7	G	10	IZH2	1.14717
G11	7	G	11	PFA4	1.23868
G12	7	G	12	SIN3	1.83413
H01	7	H	1	TOP1	4.84085
H02	7	H	2	SSH4	9.11821
H03	7	H	3	CSI2	1.16447
H04	7	H	4	COQ10	1.7071
H05	7	H	5	MDM12	1.31695
H06	7	H	6	WT	1
H07	7	H	7	HTZ1	1.60151
H08	7	H	8	HRD1	1.18906
H09	7	H	9	0	1.14351
H10	7	H	10	IRC10	1.31695
H11	7	H	11	ESC8	1.1134
H12	7	H	12	TLG2	1.70735
A01	8	A	1	WT	1			H	G	F	E	D	C	B	A
A02	8	A	2	TAT2	1.11857		1		0.870826		0.942814	0.943721	0.946465	1.32685	1
A03	8	A	3	IFM1	1.37128		2	2.79833		1.1427		0.912767	1.19219	1.35195	1.11857
A04	8	A	4	0	1.02281		3	0.973337		1.03085	0.939186	1.02929	1.27865	0.984953	1.37128
A05	8	A	5	LAG2	1.01843		4	0.871023	0.860302	0.969174	0.964349	1.0196	1.06517	1.03666	1.02281
A06	8	A	6	MDM38	1.00986		5	7.15798	1.06826	0.971558		0.989779		1.27163	1.01843
A07	8	A	7	YAP7	1.04609		6	0.951419	0.947628	0.917012	1.04452	1.10167	0.998616	1.00817	1.00986
A09	8	A	9	0	0.998884		7	0.886023	0.916244	0.975477	0.899767	0.930802	1.11781	1.01462	1.04609
A10	8	A	10	GAS5	0.981674		8	0.851453	0.9745	1.32057	0.989256	2.05569	1.08953	1.07893
A11	8	A	11	SIL1	0.890814		9	1.02365	1.03088	1.07623	1.00819	0.902651	0.924477	1.07469	0.998884
A12	8	A	12	OPI10	0.839698		10	2.18591	0.946128	0.927116	1.01067	1.05358	0.948698	1.0712	0.981674
B01	8	B	1	MSE1	1.32685		11	0.8755	0.845291	0.940535	0.891733	1.08016	0.878953	1.00458	0.890814
B02	8	B	2	0	1.35195		12	0.767767	0.907035	0.879395	0.797907	1.64335		0.817477	0.839698
B03	8	B	3	0	0.984953
B04	8	B	4	0	1.03666
B05	8	B	5	RPP2A	1.27163
B06	8	B	6	NOP12	1.00817
B07	8	B	7	NGL1	1.01462
B08	8	B	8	NTG2	1.07893
B09	8	B	9	PEX15	1.07469
B10	8	B	10	PSK2	1.0712
B11	8	B	11	0	1.00458
B12	8	B	12	LDS2	0.817477
C01	8	C	1	RRT8	0.946465
C02	8	C	2	GSH2	1.19219
C03	8	C	3	0	1.27865
C04	8	C	4	GAL11	1.06517
C06	8	C	6	nA	0.998616
C07	8	C	7	AIM39	1.11781
C08	8	C	8	PSH1	1.08953
C09	8	C	9	THI20	0.924477
C10	8	C	10	GPM3	0.948698
C11	8	C	11	0	0.878953
D01	8	D	1	GPD2	0.943721
D02	8	D	2	MAM3	0.912767
D03	8	D	3	PRS5	1.02929
D04	8	D	4	APM4	1.0196
D05	8	D	5	CRT10	0.989779
D06	8	D	6	MET22	1.10167
D07	8	D	7	INP54	0.930802
D08	8	D	8	RTG1	2.05569
D09	8	D	9	HST1	0.902651
D10	8	D	10	NBA1	1.05358
D11	8	D	11	SDH5	1.08016
D12	8	D	12	THP1	1.64335
E01	8	E	1	0	0.942814
E03	8	E	3	0	0.939186
E04	8	E	4	REX4	0.964349
E06	8	E	6	ATG19	1.04452
E07	8	E	7	ATG34	0.899767
E08	8	E	8	PHM7	0.989256
E09	8	E	9	0	1.00819
E10	8	E	10	SAM3	1.01067
E11	8	E	11	SAM4	0.891733
E12	8	E	12	PBI1	0.797907
F02	8	F	2	MDL2	1.1427
F03	8	F	3	KAR9	1.03085
F04	8	F	4	ACM1	0.969174
F05	8	F	5	DIP5	0.971558
F06	8	F	6	0	0.917012
F07	8	F	7	KEL3	0.975477
F08	8	F	8	FUM1	1.32057
F09	8	F	9	0	1.07623
F10	8	F	10	0	0.927116
F11	8	F	11	APM1	0.940535
F12	8	F	12	THI21	0.879395
G01	8	G	1	0	0.870826
G04	8	G	4	VIK1	0.860302
G05	8	G	5	ICY2	1.06826
G06	8	G	6	GYP5	0.947628
G07	8	G	7	GAL4	0.916244
G08	8	G	8	0	0.9745
G09	8	G	9	RBD2	1.03088
G10	8	G	10	0	0.946128
G11	8	G	11	HUT1	0.845291
G12	8	G	12	CIN2	0.907035
H02	8	H	2	ssh4	2.79833
H03	8	H	3	YAR1	0.973337
H04	8	H	4	ENV7	0.871023
H05	8	H	5	VMA11	7.15798
H06	8	H	6	SSO1	0.951419
H07	8	H	7	USV1	0.886023
H08	8	H	8	0	0.851453
H09	8	H	9	ALG5	1.02365
H10	8	H	10	NEW1	2.18591
H11	8	H	11	0	0.8755
H12	8	H	12	GRE1	0.767767
A01	9	A	1	FMP40	1.48128			H	G	F	E	D	C	B	A
A02	9	A	2	FLC1	1.40019		1	1.27273	3.37654	1.31893	1.81185	1.33759	3.12767	1.3269	1.48128
A03	9	A	3	RPL1A	1.40501		2		1.37703	1.21739	1.54725	2.70599	1.21509	2.66739	1.40019
A04	9	A	4	PCL8	1.38073		3	1.13787	1.26175	1.37433	1.31858	1.28464	1.18748	1.37383	1.40501
A05	9	A	5	0	2.33128		4	1.24658	1.32166	2.36383	1.35787	1.32771	1.83375	1.26636	1.38073
A06	9	A	6	CBP3	1.27453		5	1.19184	1.19201	1.24289	1.69968	2.92395	2.04792	1.35269	2.33128
A07	9	A	7	THI6	1.49381		6	1.08391	2.64004	1.27646	1.43865	2.01362	1.15511	1.23278	1.27453
A08	9	A	8	LEA1	1.39046		7	1.30842	1.26368	1.23656	2.22036	2.06426	1.13649	1.20518	1.49381
A10	9	A	10	PUS1	1.32653		8	1.12321	1.93849	1.33824	1.67576	1.2509	1.34025	2.19184	1.39046
A11	9	A	11	RKM1	1.47155		9	1.22453	2.29174	1.08612	1.07956	1.06828	1.19819	1.19699
A12	9	A	12	TYW1	1.13211		10	1.94106	1.20181	1.04824	1.79498	1.11701	1.60154	1.18854	1.32653
B01	9	B	1	PGC1	1.3269		11	1.26412	2.04625	2.26127	1.88595	2.19891	2.25171	2.65746	1.47155
B02	9	B	2	0	2.66739		12	1	0.99755	1.12265	1.13474	1.08793	1.47913	1.21626	1.13211
B03	9	B	3	TPK2	1.37383
B04	9	B	4	AFT2	1.26636
B05	9	B	5	YIG1	1.35269
B06	9	B	6	CSM4	1.23278
B07	9	B	7	0	1.20518
B08	9	B	8	RPL7B	2.19184
B09	9	B	9	0	1.19699
B10	9	B	10	OXR1	1.18854
B11	9	B	11	APL5	2.65746
B12	9	B	12	DDC1	1.21626
C01	9	C	1	RSA1	3.12767
C02	9	C	2	PRM3	1.21509
C03	9	C	3	0	1.18748
C04	9	C	4	GUP2	1.83375
C05	9	C	5	POS5	2.04792
C06	9	C	6	MF(ALPHA)1	1.15511
C07	9	C	7	0	1.13649
C08	9	C	8	UIP4	1.34025
C09	9	C	9	MRN1	1.19819
C10	9	C	10	CTI6	1.60154
C11	9	C	11	0	2.25171
C12	9	C	12	TCO89	1.47913
D01	9	D	1	PPQ1	1.33759
D02	9	D	2	CBC2	2.70599
D03	9	D	3	CUP9	1.28464
D04	9	D	4	TRE1	1.32771
D05	9	D	5	NIP100	2.92395
D06	9	D	6	MRPL40	2.01362
D07	9	D	7	COX10	2.06426
D08	9	D	8	OYE3	1.2509
D09	9	D	9	DAP1	1.06828
D10	9	D	10	MRX4	1.11701
D11	9	D	11	REV3	2.19891
D12	9	D	12	ATG29	1.08793
E01	9	E	1	SET6	1.81185
E02	9	E	2	MLH3	1.54725
E03	9	E	3	SVS1	1.31858
E04	9	E	4	0	1.35787
E05	9	E	5	BEM4	1.69968
E06	9	E	6	PET20	1.43865
E07	9	E	7	TGS1	2.22036
E08	9	E	8	PRM4	1.67576
E09	9	E	9	KIP2	1.07956
E10	9	E	10	PEP4	1.79498
E11	9	E	11	RRD2	1.88595
E12	9	E	12	0	1.13474
F01	9	F	1	ATG5	1.31893
F02	9	F	2	PXA1	1.21739
F03	9	F	3	KES1	1.37433
F04	9	F	4	POC4	2.36383
F05	9	F	5	FRK1	1.24289
F06	9	F	6	MKK2	1.27646
F07	9	F	7	UME1	1.23656
F08	9	F	8	SPP1	1.33824
F09	9	F	9	0	1.08612
F10	9	F	10	ISU1	1.04824
F11	9	F	11	RDS2	2.26127
F12	9	F	12	SPO19	1.12265
G01	9	G	1	ssh4	3.37654
G02	9	G	2	HHO1	1.37703
G03	9	G	3	KAP120	1.26175
G04	9	G	4	RNY1	1.32166
G05	9	G	5	MEI5	1.19201
G06	9	G	6	VPS30	2.64004
G07	9	G	7	DBP1	1.26368
G08	9	G	8	MRP51	1.93849
G09	9	G	9	HOS3	2.29174
G10	9	G	10	BEM3	1.20181
G11	9	G	11	0	2.04625
G12	9	G	12	WT	1
H01	9	H	1	PEX25	1.27273
H03	9	H	3	CAR1	1.13787
H04	9	H	4	GDE1	1.24658
H05	9	H	5	0	1.19184
H06	9	H	6	0	1.08391
H07	9	H	7	0	1.30842
H08	9	H	8	SSE1	1.12321
H09	9	H	9	SYH1	1.22453
H10	9	H	10	MSD1	1.94106
H11	9	H	11	FMP30	1.26412
H12	9	H	12	ELP4	1.01914
A01	10	A	1	0	1.70486			H	G	F	E	D	C	B	A
A02	10	A	2	ATG21	1.84408		1	1.38623	1.6739	1.48782	1.33817	1.34623	1.81177	1.59784	1.70486
A03	10	A	3	INA17	1.80853		2	8.62986	1.45186	1.37876	1.54497	1.73332	1.57596	1.74282	1.84408
A04	10	A	4	MGR2	1.80401		3	1.49317	1.85802	1.41494		1.50359	1.79475	2.69882	1.80853
A06	10	A	6	PNG1	1.64979		4	1.18248	1.57934	1.45477		1.35322	1.75289	2.11238	1.80401
A07	10	A	7	EEB1	1.73745		5	1.36204	1.17957	1.10362		1.29088
A08	10	A	8	SSU1	1.88579		6	1.3155	1.37421	1.2588	1.66198	1.2476	1.26072	1.31381	1.64979
A09	10	A	9	WT	1		7	1.33503	1.52453	1.48302	1.33037	1.52398	1.6124	1.56516	1.73745
A11	10	A	11	SWD3	1.47189		8	1.47227	1.25279	1.6777	1.46327	1.35709	1.70442	1.39913	1.88579
A12	10	A	12	ECM31	1.32353		9	1.22142	1.66005	1.22267	1.10996	1.34536	1.2987	1.42532	1
B01	10	B	1	EHT1	1.59784		10	1.43839	3.05997	0.99553	1.6322		1.19173	1.29443
B02	10	B	2	0	1.74282		11	1.11605	1.47174	1.10138	1.4064		1.57841	1.32468	1.47189
B03	10	B	3	FZO1	2.69882		12	1.32503	1.66363	1.35132	1.06322	1.4136	1.1718	1.17547	1.32353
B04	10	B	4	DTR1	2.11238
B06	10	B	6	SMP1	1.31381
B07	10	B	7	YPC1	1.56516
B08	10	B	8	0	1.39913
B09	10	B	9	MBA1	1.42532
B10	10	B	10	PCH2	1.29443
B11	10	B	11	GDT1	1.32468
B12	10	B	12	NTC20	1.17547
C01	10	C	1	AIM4	1.81177
C02	10	C	2	MSI1	1.57596
C03	10	C	3	0	1.79475
C04	10	C	4	KTR4	1.75289
C06	10	C	6	DER1	1.26072
C07	10	C	7	COS111	1.6124
C08	10	C	8	LDH1	1.70442
C09	10	C	9	KTR3	1.2987
C10	10	C	10	0	1.19173
C11	10	C	11	FTH1	1.57841
C12	10	C	12	DUR1,2	1.1718
D01	10	D	1	0	1.34623
D02	10	D	2	ERV15	1.73332
D03	10	D	3	NGR1	1.50359
D04	10	D	4	MET8	1.35322
D05	10	D	5	SDS24	1.29088
D06	10	D	6	HPC2	1.2476
D07	10	D	7	YBP1	1.52398
D08	10	D	8	ATG12	1.35709
D09	10	D	9	PYC2	1.34536
D12	10	D	12	PDB1	1.4136
E01	10	E	1	PCS60	1.33817
E02	10	E	2	TDP1	1.54497
E06	10	E	6	MCX1	1.66198
E07	10	E	7	SLX1	1.33037
E08	10	E	8	ROT2	1.46327
E09	10	E	9	OM14	1.10996
E10	10	E	10	SWC5	1.6322
E11	10	E	11	PBP2	1.4064
E12	10	E	12	VHC1	1.06322
F01	10	F	1	0	1.48782
F02	10	F	2	ERT1	1.37876
F03	10	F	3	THI2	1.41494
F04	10	F	4	0	1.45477
F05	10	F	5	0	1.10362
F06	10	F	6	GPX2	1.2588
F07	10	F	7	ISW1	1.48302
F08	10	F	8	RRT2	1.6777
F09	10	F	9	HIS7	1.22267
F10	10	F	10	ARO4	0.99553
F11	10	F	11	SPO23	1.10138
F12	10	F	12	MRPS5	1.35132
G01	10	G	1	MTC4	1.6739
G02	10	G	2	SHG1	1.45186
G03	10	G	3	0	1.85802
G04	10	G	4	RGD1	1.57934
G05	10	G	5	TAE1	1.17957
G06	10	G	6	MIC12	1.37421
G07	10	G	7	SHM1	1.52453
G08	10	G	8	YPT10	1.25279
G09	10	G	9	SLM6	1.66005
G10	10	G	10	REI1	3.05997
G11	10	G	11	MRPL37	1.47174
G12	10	G	12	VMS1	1.66363
H01	10	H	1	TPI1	1.38623
H02	10	H	2	SSH4	8.62986
H03	10	H	3	DET1	1.49317
H04	10	H	4	PST1	1.18248
H05	10	H	5	0	1.36204
H06	10	H	6	YOS9	1.3155
H07	10	H	7	UBC5	1.33503
H08	10	H	8	0	1.47227
H09	10	H	9	AIM7	1.22142
H10	10	H	10	RRG1	1.43839
H11	10	H	11	RTR2	1.11605
H12	10	H	12	OCA6	1.32503
A01	11	A	1	WT	1			H	G	F	E	D	C	B	A
A02	11	A	2	DOA4	1.04574		1		1.67556	1.50535	1.39593	1.32335	1.23098	1.15722	1
A03	11	A	3	FMP16	1.10033		2	1.07908	1.67887	1.51409			1.24592	1.17032	1.04574
A04	11	A	4	IPT1	1.10183		3	1.08057	1.68511	1.53715	1.40289		1.24959	1.17775	1.10033
A06	11	A	6	PPH3	1.12237		4	1.09492	1.68961	1.53797	1.40348	1.32572	1.26545	1.18153	1.10183
A07	11	A	7	RAD55	1.13218		5	2.0235	1.69317	1.59273	1.40841	1.33566	1.26757	1.18265
A08	11	A	8	SED1	1.13641		6	2.12175	1.70268	1.59419	1.42729	1.34525	1.27383	1.18271	1.12237
A09	11	A	9	SHU2	1.13885		7	2.12715	1.7231	1.61647	1.44114	1.35204	1.27584	1.19099	1.13218
A10	11	A	10	PET100	1.14652		8	2.35211	1.78635	1.62269	1.44158	1.3742	1.3001	1.20063	1.13641
A11	12	A	11	0	1.1494		9	2.88268	1.87562	1.62308	1.44572	1.37667	1.30352	1.21703	1.13885
A12	11	A	12	VPS41	6.17901		10		1.8871	1.64662	1.46675	1.38561	1.30621	1.22136	1.14652
B01	11	B	1	RRP8	1.15722		11	4.45601	1.93249	1.66869	1.46924	1.39202	1.3174	1.22698	1.1494
B02	11	B	2	TVP23	1.17032		12	18.7833	1.94346	1.67177	1.49495	1.3957	1.32294	1.22749	6.17901
B03	11	B	3	AFR1	1.17775
B04	11	B	4	0	1.18153
B05	11	B	5	0	1.18265
B06	11	B	6	UBC13	1.18271
B07	11	B	7	DNF2	1.19099
B08	11	B	8	0	1.20063
B09	11	B	9	0	1.21703
B10	11	B	10	GIS1	1.22136
B11	11	B	11	MSH6	1.22698
B12	11	B	12	GRX3	1.22749
C01	11	C	1	BMH2	1.23098
C02	11	C	2	TVP15	1.24592
C03	11	C	3	ARX1	1.24959
C04	11	C	4	0	1.26545
C05	11	C	5	STE5	1.26757
C06	11	C	6	SPO71	1.27383
C07	11	C	7	TMS1	1.27584
C08	11	C	8	TMN2	1.3001
C09	11	C	9	TRS85	1.30352
C10	11	C	10	0	1.30621
C11	11	C	11	FOB1	1.3174
C12	11	C	12	ALT2	1.32294
D01	11	D	1	IRC2	1.32335
D04	11	D	4	MRPL1	1.32572
D05	11	D	5	TMA64	1.33566
D06	11	D	6	VBA4	1.34525
D07	11	D	7	TRM1	1.35204
D08	11	D	8	DPB4	1.3742
D09	11	D	9	KIN1	1.37667
D10	11	D	10	INO2	1.38561
D11	11	D	11	0	1.39202
D12	11	D	12	ECM18	1.3957
E01	11	E	1	SWF1	1.39593
E03	11	E	3	MTC5	1.40289
E04	11	E	4	SAC6	1.40348
E05	11	E	5	FIN1	1.40841
E06	11	E	6	0	1.42729
E07	11	E	7	0	1.44114
E08	11	E	8	0	1.44158
E09	11	E	9	nA	1.44572
E10	11	E	10	YCF1	1.46675
E11	11	E	11	VPS61	1.46924
E12	11	E	12	RGP1	1.49495
F01	11	F	1	AGC1	1.50535
F02	11	F	2	RUB1	1.51409
F03	11	F	3	MTQ2	1.53715
F04	11	F	4	PEX7	1.53797
F05	11	F	5	SAN1	1.59273
F06	11	F	6	MKC7	1.59419
F07	11	F	7	SWI5	1.61647
F08	11	F	8	0	1.62269
F09	11	F	9	0	1.62308
F10	11	F	10	0	1.64662
F11	11	F	11	HXT3	1.66869
F12	11	F	12	SVF1	1.67177
G01	11	G	1	MRP1	1.67556
G02	11	G	2	PAL1	1.67887
G03	11	G	3	YPS7	1.68511
G04	11	G	4	ATP22	1.68961
G05	11	G	5	SBE2	1.69317
G06	11	G	6	YPQ2	1.70268
G07	11	G	7	TRP4	1.7231
G08	11	G	8	CNL1	1.78635
G09	11	G	9	GGA1	1.87562
G10	11	G	10	EAF1	1.8871
G11	11	G	11	OPI7	1.93249
G12	11	G	12	ESC2	1.94346
H02	11	H	2	0	1.07908
H03	11	H	3	YPR1	1.08057
H04	11	H	4	XRS2	1.09492
H05	11	H	5	DXO1	2.0235
H06	11	H	6	CTS2	2.12175
H07	11	H	7	VPS74	2.12715
H08	11	H	8	PHO92	2.35211
H09	11	H	9	BCS1	2.88268
H11	11	H	11	LSM6	4.45601
H12	11	H	12	SSH4	18.7833
A01	12	A	1	ARO10	2.25696			H	G	F	E	D	C	B	A
A02	12	A	2	RPP2B	2.11374		1	1.16406	1.16323	1.57788	1.53715	1.68906	1.80793	2.58102	2.25696
A03	12	A	3	NKP1	2.02795		2	1.38094	1.4848	1.28721	1.80878	2.36886	2.39259	2.48123	2.11374
A04	12	A	4	ATO3	1.98724		3	1.33441	1.31695	6.54665	1.57883	1.84445	1.74074	2.18949	2.02795
A05	12	A	5	EFT2	2.23554		4	1.31349	1.33852	1.41846	2.20549	1.78108	2.07921	2.07252	1.98724
A06	12	A	6	MUS81	1.96924		5	1.47889	1.0615	1.51403	1.37124	1.55468	1.78682	1.61113	2.23554
A07	12	A	7	0	1.6722		6	1.59032	1.09061		1.4927	1.36177	1.73317	1.75457	1.96924
A08	12	A	8	RVS167	2.13532		7	2.29869	1.43149	1.45251	1.41928	1.70897	1.64802	2.03912	1.6722
A09	12	A	9	SAC7	1.60083		8	1.81819	1.39632	1.37653	1.53101	2.07186	1.57879	1.90943	2.13532
A10	12	A	10	0	1.56155		9	1.42907	2.1126	1.07538	1.46774	1.38609	1.57154	1.98775	1.60083
A11	12	A	11	SPT3	1.77051		10	1.3108	6.60287	1.25621	1.32363	1.77119	1.53926	1.75797	1.56155
A12	12	A	12	SSH4	5.96561		11	1.25961	1.25181	1.22881	1.46076	1.28352	1.5288	1.52745	1.77051
B01	12	B	1	SHE9	2.58102		12	1.27198	1.19379	1.36614	1.02886	1	1.37975	1.5641	5.96561
B02	12	B	2	SXM1	2.48123
B03	12	B	3	HPT1	2.18949
B04	12	B	4	URH1	2.07252
B05	12	B	5	0	1.61113
B06	12	B	6	DIT2	1.75457
B07	12	B	7	DIT1	2.03912
B08	12	B	8	MRP20	1.90943
B09	12	B	9	PDR15	1.98775
B10	12	B	10	ADE8	1.75797
B11	12	B	11	SIZ1	1.52745
B12	12	B	12	STE14	1.5641
C01	12	C	1	DFM1	1.80793
C02	12	C	2	ERD1	2.39259
C03	12	C	3	0	1.74074
C04	12	C	4	RPL12B	2.07921
C05	12	C	5	RAD30	1.78682
C06	12	C	6	HKR1	1.73317
C07	12	C	7	ARO80	1.64802
C08	12	C	8	SIP1	1.57879
C09	12	C	9	CAD1	1.57154
C10	12	C	10	SNX41	1.53926
C11	12	C	11	0	1.5288
C12	12	C	12	BNA7	1.37975
D01	12	D	1	CYM1	1.68906
D02	12	D	2	0	2.36886
D03	12	D	3	NPL3	1.84445
D04	12	D	4	0	1.78108
D05	12	D	5	PPM1	1.55468
D06	12	D	6	PPZ2	1.36177
D07	12	D	7	IRC22	1.70897
D08	12	D	8	GIM4	2.07186
D09	12	D	9	YEA4	1.38609
D10	12	D	10	VAB2	1.77119
D11	12	D	11	YEA6	1.28352
D12	12	D	12	WT	1
E01	12	E	1	0	1.53715
E02	12	E	2	GCN4	1.80878
E03	12	E	3	0	1.57883
E04	12	E	4	VAC8	2.20549
E05	12	E	5	0	1.37124
E06	12	E	6	EDC3	1.4927
E07	12	E	7	NPP2	1.41928
E08	12	E	8	PMP2	1.53101
E09	12	E	9	GTT3	1.46774
E10	12	E	10	MDM36	1.32363
E11	12	E	11	0	1.46076
E12	12	E	12	0	1.02886
F01	12	F	1	RIP1	1.57788
F02	12	F	2	0	1.28721
F03	12	F	3	VMA3	6.54665
F04	12	F	4	0	1.41846
F05	12	F	5	ECM10	1.51403
F07	12	F	7	MTC7	1.45251
F08	12	F	8	NVJ2	1.37653
F09	12	F	9	RAD23	1.07538
F10	12	F	10	UTR4	1.25621
F11	12	F	11	CYC7	1.22881
F12	12	F	12	UTR2	1.36614
G01	12	G	1	YEF1	1.16323
G02	12	G	2	GDA1	1.4848
G03	12	G	3	0	1.31695
G04	12	G	4	0	1.33852
G05	12	G	5	GLY1	1.0615
G06	12	G	6	FRD1	1.09061
G07	12	G	7	TCA17	1.43149
G08	12	G	8	PAU2	1.39632
G09	12	G	9	RML2	2.1126
G10	12	G	10	VMA8	6.60287
G11	12	G	11	AFG1	1.25181
G12	12	G	12	MAK10	1.19379
H01	12	H	1	RPL12A	1.16406
H02	12	H	2	0	1.38094
H03	12	H	3	HAT2	1.33441
H04	12	H	4	0	1.31349
H05	12	H	5	HHY1	1.47889
H06	12	H	6	PRB1	1.59032
H07	12	H	7	CIN8	2.29869
H08	12	H	8	NPR2	1.81819
H09	12	H	9	CAN1	1.42907
H10	12	H	10	AVT2	1.3108
H11	12	H	11	SIT1	1.25961
H12	12	H	12	HPA3	1.27198
A01	13	A	1	0	1.642			H	G	F	E	D	C	B	A
A03	13	A	3	DLD3	1.3899		1	1				1.19542	1.42705		1.642
A05	13	A	5	MNN1	1.63724		2	3.25223	1.23475	1.25969	1.20763	1.35212	1.53263
A06	13	A	6	NOP16	1.41031		3	1.18221		1.26583	1.28473	1.38453	1.54429		1.3899
A07	13	A	7	FMP52	1.47839		4	1.28332		1.46934	1.67905	1.53712	1.52757
A09	13	A	9	TMA20	1.55509		5	1.23495	1.18463	1.22887		1.42489	1.38912	1.59602	1.63724
A11	13	A	11	0	1.60622		6	1.41732		1.53145	1.44554		1.44796	1.46248	1.41031
A12	13	A	12	TIR1	1.51263		7	1.62733	1.09269	1.57693		1.59403	1.58745	1.78839	1.47839
B04	13	B	5	SBH2	1.59602		8	1.27717	1.33088	1.48182	1.37605		1.8302	1.73959
B05	13	B	6	GPA2	1.46248		9	1.43156	1.52879	1.73042	1.30358	1.63248	1.59407		1.55509
B06	13	B	7	YAT2	1.78839		10			1.29564	1.60605	2.12864	1.70539
B07	13	B	8	CHZ1	1.73959		11	1.15896	1.20741	1.36172	1.29126	1.47616	1.71096	1.40896	1.60622
B11	13	B	11	0	1.40896		12	1.35959		1.20189	1.36894	1.3185	1.58454	1.42948	1.51263
B12	13	B	12	EDC2	1.42948
C01	13	C	1	0	1.42705
C02	13	C	2	HVG1	1.53263
C03	13	C	3	GLN3	1.54429
C04	13	C	4	YEN1	1.52757
C05	13	C	5	MXR1	1.38912
C06	13	C	6	MEI4	1.44796
C07	13	C	7	ACA1	1.58745
C08	13	C	8	0	1.8302
C09	13	C	9	SAP1	1.59407
C10	13	C	10	CAJ1	1.70539
C11	13	C	11	TPA1	1.71096
C12	13	C	12	RSM18	1.58454
D01	13	D	1	JHD1	1.19542
D02	13	D	2	HOM3	1.35212
D03	13	D	3	PIC2	1.38453
D04	13	D	4	GIP2	1.53712
D05	13	D	5	FCY2	1.42489
D07	13	D	7	HMF1	1.59403
D09	13	D	9	PCL6	1.63248
D10	13	D	10	FCY21	2.12864
D11	13	D	11	FCY22	1.47616
D12	13	D	12	CEM1	1.3185
E02	13	E	2	ICL1	1.20763
E03	13	E	3	0	1.28473
E04	13	E	4	RGI1	1.67905
E06	13	E	6	MOT2	1.44554
E08	13	E	8	ARG5,6	1.37605
E09	13	E	9	MRI1	1.30358
E10	13	E	10	TDA2	1.60605
E11	13	E	11	VTC1	1.29126
E12	13	E	12	ALD5	1.36894
F02	13	F	2	PTP3	1.25969
F03	13	F	3	0	1.26583
F04	13	F	4	AIM9	1.46934
F05	13	F	5	SER3	1.22887
F06	13	F	6	GET2	1.53145
F07	13	F	7	0	1.57693
F08	13	F	8	0	1.48182
F09	13	F	9	ILV1	1.73042
F10	13	F	10	0	1.29564
F11	13	F	11	PPT1	1.36172
F12	13	F	12	ASN2	1.20189
G02	13	G	2	0	1.23475
G05	13	G	5	0	1.18463
G07	13	G	7	PHB1	1.09269
G08	13	G	8	PEX4	1.33088
G09	13	G	9	PRE9	1.52879
G11	13	G	11	0	1.20741
H01	13	H	1	WT	1
H02	13	H	2	SSH4	3.25223
H03	13	H	3	VPS62	1.18221
H04	13	H	4	BTN2	1.28332
H05	13	H	5	SKN1	1.23495
H06	13	H	6	THI4	1.41732
H07	13	H	7	ECL1	1.62733
H08	13	H	8	RPL24B	1.27717
H09	13	H	9	0	1.43156
H11	13	H	11	0	1.15896
H12	13	H	12	RSR1	1.35959
A01	14	A	1	0	1.57846			H	G	F	E	D	C	B	A
A02	14	A	2	GTO1	1.55873		1	1.70528	1.26797	1.06229	1.10747	1.06537	1.66907	1.34878	1.57846
A03	14	A	3	CHO2	3.88168		2	8.69888	1.04389		1	1.03342	1.31242		1.55873
A04	14	A	4	NSR1	1.82178		3	1.57234	1.2279		1.07318	1.52149	1.3158	1.55707	3.88168
A05	14	A	5	0	1.62752		4	2.1172	1.24377	1.31147	1.13502	1.08817	1.20404	1.72169	1.82178
A06	14	A	6	RTS3	1.44488		5	2.0247	1.3377	0.999426	1.04759		1.23076	1.47327	1.62752
A07	14	A	7	GTR2	1.49546		6	2.54783	1.3224	1.25749	1.03314	1.08922	1.32928	1.8966	1.44488
A08	14	A	8	0	1.58594		7	1.12905	1.08244	1.22279	1.10631	1.09073	1.25091	1.30505	1.49546
A09	14	A	9	MRPS35	1.74972		8	1.18638	1.15796	1.01454	1.92769	1.19049	1.49551	1.42228	1.58594
A10	14	A	10	TRS65	1.35029		9		1.15921	1.74472	1.18038	1.11672	1.2443	1.42862	1.74972
A11	14	A	11	nA	1.24783		10	1.06676	0.988182	1.07567	1.13546	2.02713	1.17341	1.96983	1.35029
A12	14	A	12	0	1.19446		11	0.976731	1.13815	1.0439	0.972026	1.26704	1.03345	1.29953	1.24783
B01	14	B	1	PUS6	1.34878		12	1.84225	1.07675	1.08211	1.0991	1.08798	1.06521	1.22968	1.19446
B03	14	B	3	PSD2	1.55707
B04	14	B	4	MSM1	1.72169
B05	14	B	5	RBG2	1.47327
B06	14	B	6	CBP4	1.8966
B07	14	B	7	0	1.30505
B08	14	B	8	ATF2	1.42228
B09	14	B	9	PBP1	1.42862
B10	14	B	10	RNR4	1.96983
B11	14	B	11	TIM13	1.29953
B12	14	B	12	0	1.22968
C01	14	C	1	QCR9	1.66907
C02	14	C	2	UBR1	1.31242
C03	14	C	3	HGH1	1.3158
C04	14	C	4	CRH1	1.20404
C05	14	C	5	TDH3	1.23076
C06	14	C	6	PDX1	1.32928
C07	14	C	7	XKS1	1.25091
C08	14	C	8	FYV8	1.49551
C09	14	C	9	SNG1	1.2443
C10	14	C	10	PMT6	1.17341
C11	14	C	11	ELP2	1.03345
C12	14	C	12	PCT1	1.06521
D01	14	D	1	YCH1	1.06537
D02	14	D	2	TDA10	1.03342
D03	14	D	3	MVB12	1.52149
D04	14	D	4	CIR1	1.08817
D06	14	D	6	TRX2	1.08922
D07	14	D	7	SLI1	1.09073
D08	14	D	8	RTA1	1.19049
D09	14	D	9	RPS0A	1.11672
D10	14	D	10	RSM27	2.02713
D11	14	D	11	CCH1	1.26704
D12	14	D	12	ARN2	1.08798
E01	14	E	1	PAU13	1.10747
E02	14	E	2	WT	1
E03	14	E	3	0	1.07318
E04	14	E	4	ECM34	1.13502
E05	14	E	5	0	1.04759
E06	14	E	6	0	1.03314
E07	14	E	7	ARN1	1.10631
E08	14	E	8	CBP2	1.92769
E09	14	E	9	0	1.18038
E10	14	E	10	MUP3	1.13546
E11	14	E	11	VMR1	0.972026
E12	14	E	12	SBP1	1.0991
F01	14	F	1	RPL8A	1.06229
F04	14	F	4	ECM29	1.31147
F05	14	F	5	OCA5	0.999426
F06	14	F	6	WSC4	1.25749
F07	14	F	7	RIM101	1.22279
F08	14	F	8	0	1.01454
F09	14	F	9	NPR3	1.74472
F10	14	F	10	SPO11	1.07567
F11	14	F	11	AIM17	1.0439
F12	14	F	12	OPI1	1.08211
G01	14	G	1	APM2	1.26797
G02	14	G	2	0	1.04389
G03	14	G	3	DUR3	1.2279
G04	14	G	4	YLF2	1.24377
G05	14	G	5	OTU2	1.3377
G06	14	G	6	0	1.3224
G07	14	G	7	ETP1	1.08244
G08	14	G	8	YAP3	1.15796
G09	14	G	9	0	1.15921
G10	14	G	10	STE20	0.988182
G11	14	G	11	SHU1	1.13815
G12	14	G	12	0	1.07675
H01	14	H	1	LAG1	1.70528
H02	14	H	2	SSH4	8.69888
H03	14	H	3	QCR10	1.57234
H04	14	H	4	DIA4	2.1172
H05	14	H	5	VPS29	2.0247
H06	14	H	6	ARD1	2.54783
H07	14	H	7	SPO13	1.12905
H08	14	H	8	MIP6	1.18638
H10	14	H	10	0	1.06676
H11	14	H	11	YHI9	0.976731
H12	14	H	12	SLT2	1.84225
A01	15	A	1	RRM3	2.11805			H	G	F	E	D	C	B	A
A02	15	A	2	PIH1	1.70141		1	1.78552	1.42987	1.25339	1.43239	1.60682	3.52907	1.68393	2.11805
A03	15	A	3	NEL1	1.88937		2	6.14495	1.30186	1.75944	1.30305	1.6399	2.11941	2.49707	1.70141
A04	15	A	4	PUT2	1.81184		3	1.10777	1.33656	1.30619	1.48127	3.02233	1.18779		1.88937
A05	15	A	5	RRF1	2.1595		4	1.40645	1.42345	2.22183	3.27346	1.77253	1.691		1.81184
A06	15	A	6	MSC7	1.89258		5	1.39675	1.54493	1.6479	1.86939	1.72316	1.83542	2.13124	2.1595
A07	15	A	7	DOG2	1.91098		6	1	1.78232	1.25002	1.43756	1.43203	1.89848	5.32036	1.89258
A08	15	A	8	DOG1	1.8627		7	1.76802	1.25507	1.25734	1.20031	1.6797	1.72571	1.69876	1.91098
A09	15	A	9	INM1	1.9504		8	1.52537	1.51094	1.21345	1.45533	1.43524	2.42984	1.72498	1.8627
A10	15	A	10	AAP1	1.75846		9	1.21775	1.39984	1.15104	1.56714	1.67833	1.6222	1.66847	1.9504
A11	15	A	11	YHK8	1.66542		10	1.0612	1.42908	1.19652	1.39083	1.2603	1.34098	1.56876	1.75846
A12	15	A	12	FSH1	1.50751		11	1.13991	1.33436	1.36903	1.28009	2.88807	1.76699	1.6897	1.66542
B01	15	B	1	0	1.68393		12	1.59001	1.08409	1.26663	2.46754	1.28118	1.22934	1.37332	1.50751
B02	15	B	2	SMF2	2.49707
B05	15	B	5	CPR2	2.13124
B06	15	B	6	VMA22	5.32036
B07	15	B	7	GIC1	1.69876
B08	15	B	8	SSF1	1.72498
B09	15	B	9	OSH3	1.66847
B10	15	B	10	PPE1	1.56876
B11	15	B	11	PTC7	1.6897
B12	15	B	12	NMD2	1.37332
C01	15	C	1	0	3.52907
C02	15	C	2	IRE1	2.11941
C03	15	C	3	0	1.18779
C04	15	C	4	LRP1	1.691
C05	15	C	5	KSP1	1.83542
C06	15	C	6	NAM8	1.89848
C07	15	C	7	RTC3	1.72571
C08	15	C	8	MSR1	2.42984
C09	15	C	9	HXT4	1.6222
C10	15	C	10	AHT1	1.34098
C11	15	C	11	HXT1	1.76699
C12	15	C	12	0	1.22934
D01	15	D	1	HXT5	1.60682
D02	15	D	2	0	1.6399
D03	15	D	3	GEP4	3.02233
D04	15	D	4	SBE22	1.77253
D05	15	D	5	GRE3	1.72316
D06	15	D	6	YPT35	1.43203
D07	15	D	7	TRR2	1.6797
D08	15	D	8	GGA2	1.43524
D09	15	D	9	CTM1	1.67833
D10	15	D	10	ERP5	1.2603
D11	15	D	11	UBA4	2.88807
D12	15	D	12	0	1.28118
E01	15	E	1	APE4	1.43239
E02	15	E	2	BZZ1	1.30305
E03	15	E	3	DMA1	1.48127
E04	15	E	4	COX23	3.27346
E05	15	E	5	TOM71	1.86939
E06	15	E	6	MSH1	1.43756
E07	15	E	7	LSM12	1.20031
E08	15	E	8	EPT1	1.45533
E09	15	E	9	NDT80	1.56714
E10	15	E	10	0	1.39083
E11	15	E	11	ANS1	1.28009
E12	15	E	12	ARP1	2.46754
F01	15	F	1	0	1.25339
F02	15	F	2	ECM14	1.75944
F03	15	F	3	NSG1	1.30619
F04	15	F	4	WSS1	2.22183
F05	15	F	5	YCK1	1.6479
F06	15	F	6	SPL2	1.25002
F07	15	F	7	ARO9	1.25734
F08	15	F	8	0	1.21345
F09	15	F	9	SPS100	1.15104
F10	15	F	10	0	1.19652
F11	15	F	11	CHS7	1.36903
F12	15	F	12	DSE2	1.26663
G01	15	G	1	MRPL6	1.42987
G02	15	G	2	PEX28	1.30186
G03	15	G	3	MTC6	1.33656
G04	15	G	4	SPO12	1.42345
G05	15	G	5	SPO16	1.54493
G06	15	G	6	RTT107	1.78232
G07	15	G	7	YSP1	1.25507
G08	15	G	8	LIN1	1.51094
G09	15	G	9	REC104	1.39984
G10	15	G	10	KEL1	1.42908
G11	15	G	11	TDA11	1.33436
G12	15	G	12	PEX18	1.08409
H01	15	H	1	YAP1801	1.78552
H02	14	H	2	SSH4	6.14495
H03	15	H	3	SOL3	1.10777
H04	15	H	4	THP2	1.40645
H05	15	H	5	FMO1	1.39675
H06	15	H	6	WT	1
H07	15	H	7	STB5	1.76802
H08	15	H	8	OYE2	1.52537
H09	15	H	9	0	1.21775
H10	15	H	10	GND1	1.0612
H11	15	H	11	SSP1	1.13991
H12	15	H	12	PTH1	1.59001
A01	16	A	1	NVJ1	1.97611			H	G	F	E	D	C	B	A
A02	16	A	2	AIM18	2.10541		1	1.78552	1.42987	1.25339	1.43239	1.60682	3.52907	1.68393	2.11805
A03	16	A	3	AIM46	1.76074		2	6.14495	1.30186	1.75944	1.30305	1.6399	2.11941	2.49707	1.70141
A04	16	A	4	RPN10	1.89046		3	1.10777	1.33656	1.30619	1.48127	3.02233	1.18779		1.88937
A05	16	A	5	0	2.14938		4	1.40645	1.42345	2.22183	3.27346	1.77253	1.691		1.81184
A06	16	A	6	RPS4B	1.90741		5	1.39675	1.54493	1.6479	1.86939	1.72316	1.83542	2.13124	2.1595
A07	16	A	7	MNL1	1.75122		6	1	1.78232	1.25002	1.43756	1.43203	1.89848	5.32036	1.89258
A08	16	A	8	SKN7	3.096		7	1.76802	1.25507	1.25734	1.20031	1.6797	1.72571	1.69876	1.91098
A09	16	A	9	SET5	1.78661		8	1.52537	1.51094	1.21345	1.45533	1.43524	2.42984	1.72498	1.8627
A10	16	A	10	CRG1	1.57392		9	1.21775	1.39984	1.15104	1.56714	1.67833	1.6222	1.66847	1.9504
A11	16	A	11	0	1.4764		10	1.0612	1.42908	1.19652	1.39083	1.2603	1.34098	1.56876	1.75846
A12	16	A	12	RER1	1.74387		11	1.13991	1.33436	1.36903	1.28009	2.88807	1.76699	1.6897	1.66542
B01	16	B	1	0	2.13602		12	1.59001	1.08409	1.26663	2.46754	1.28118	1.22934	1.37332	1.50751
B02	16	B	2	LDB16	2.8568
B03	16	B	3	SHH3	2.08683
B04	16	B	5	VPS23	8.34545
B06	16	B	6	ILV6	1.93528
B07	16	B	7	SGF29	1.51698
B08	16	B	8	GBP2	1.96371
B09	16	B	9	nA	1.95446
B10	16	B	10	nA	1.73014
B11	16	B	11	BUD3	2.1697
B12	16	B	12	DCC1	2.31381
C01	16	C	1	0	1.41394
C02	16	C	2	KCC4	1.84349
C03	16	C	3	AGP1	1.57986
C04	16	C	4	nA	1.95749
C05	16	C	5	FUS1	1.9095
C06	16	C	6	RNQ1	1.90965
C07	16	C	7	BIK1	1.55958
C08	16	C	8	HIS4	1.64341
C09	16	C	9	STE50	2.03499
C10	16	C	10	MXR2	1.80886
C11	16	C	11	LSB5	1.65416
C12	16	C	12	GFD2	1.70619
D01	16	D	1	SRO9	1.97405
D02	16	D	2	GID7	2.30091
D03	16	D	3	GLK1	1.48208
D04	16	D	4	0	1.67475
D05	16	D	5	MGR1	1.36094
D06	16	D	6	EMC1	1.53424
D07	16	D	7	0	1.56229
D08	16	D	8	POF1	1.52434
D09	16	D	9	SPS22	1.51672
D10	16	D	10	0	1.50376
D11	16	D	11	APA1	1.47635
D12	16	D	12	LRE1	1.63747
E01	16	E	1	KAR4	1.34746
E02	16	E	2	PEX34	1.57195
E03	16	E	3	PRD1	1.38717
E04	16	E	4	nA	2.70514
E06	16	E	6	nA	1.28808
E07	16	E	7	VAC17	1.67736
E08	16	E	8	CHA1	1.39722
E09	16	E	9	VBA3	1.46995
E10	16	E	10	0	1.33741
E11	16	E	11	CDC10	4.5668
E12	16	E	12	MRPL32	1.87517
F01	16	F	1	YCP4	1.35552
F02	16	F	2	CIT2	1.2472
F03	16	F	3	0	1.13584
F04	16	F	4	0	1.3136
F05	16	F	5	SAT4	1.12299
F07	16	F	7	ADY2	1.43501
F08	16	F	8	ADP1	1.29334
F09	16	F	9	POL4	1.25515
F10	16	F	10	CTO1	1.26013
F11	16	F	11	0	1.37435
F12	16	F	12	CWH43	1.38355
G01	16	G	1	MAK32	1.31357
G02	16	G	2	PET18	1.08733
G03	16	G	3	WT	1
G04	16	G	4	HSP30	1.64653
G05	16	G	5	0	1.07498
G06	16	G	6	0	1.58626
G08	16	G	8	LEU3	1.15208
G09	16	G	9	0	1.19987
G10	16	G	10	DCN1	1.1616
G11	16	G	11	ZRT2	1.31338
G12	16	G	12	ACE2	3.20717
H01	16	H	1	CKI1	1.89344
H02	16	H	2	SSH4	7.14403
H03	16	H	3	PDC5	1.14261
H04	16	H	4	SLX4	1.05744
H05	16	H	5	TIS11	1.23062
H06	16	H	6	RKM5	1.05565
H07	16	H	7	NHA1	1.17149
H08	16	H	8	SLS1	1.32467
H09	16	H	9	PUT1	1.0961
H10	16	H	10	DPH6	1.26613
H11	16	H	11	ACF2	1.16358
H12	16	H	12	0	1.1755
A01	17	A	1	0	1.68293			H	G	F	E	D	C	B	A
A02	17	A	2	STM1	2.77407		1	1.75344	1.12859	1.13049	1.77309	1.34809	1.16077	1.15767	1.68293
A03	17	A	3	PCD1	1.50194		2	7.56589	1.27774	1.35832	1.12202	1.13355	1.03432	1.16796	2.77407
A04	17	A	4	0	1.39071		3	1.57547	0.960372	1.21392	1.10337	0.994924	1.31697	1.24987	1.50194
A05	17	A	5	RNH203	1.25488		4	0.896553	1.22369	1.59949	1.49341	1.16717	1.03815	1.35231	1.39071
A06	17	A	6	SHH4	1.2323		5	1.01432	1.06981	0.98316	0.928798	1.11592	1.27867		1.25488
A07	17	A	7	PUS5	1.20857		6	1.59216	1.18727	1.89345	1.10983	1.15891	1.02484	1.04196	1.2323
A08	17	A	8	UPS2	1.52011		7	1.27263	1.24496	1.09164	1.10372	0.886795	1.74738	0.958822	1.20857
A09	17	A	9	0	1.29215		8	1.39929	1.17016	1.01289	1.04331	0.98603	1.12934	0.989038	1.52011
A10	17	A	10	APS1	1.29811		9	0.963404	7.92818	1.23329	6.73228	0.909205	1.03717	2.81134	1.29215
A11	17	A	11	0	0.991368		10	2.70014	1.03413	0.977837	0.941311	1.07699	1.32006	2.05631	1.29811
A12	17	A	12	DPH5	1.16917		11	0.784351	1	0.929377	1.14307	0.981432	1.19031	1.14662	0.991368
B01	17	B	1	0	1.15767		12	0.905911	0.765035	0.943417	0.789712	0.840873	1.29918	0.890837	1.16917
B02	17	B	2	IDP2	1.16796
B03	17	B	3	RFX1	1.24987
B04	17	B	4	0	1.35231
B06	17	B	6	TFS1	1.04196
B07	17	B	7	0	0.958822
B08	17	B	8	SAM1	0.989038
B09	17	B	9	VTA1	2.81134
B10	17	B	10	SWI6	2.05631
B11	17	B	11	TOS4	1.14662
B12	17	B	12	0	0.890837
C01	17	C	1	RPL37A	1.16077
C02	17	C	2	SKG3	1.03432
C03	17	C	3	MDL1	1.31697
C04	17	C	4	ATG26	1.03815
C05	17	C	5	MMR1	1.27867
C06	17	C	6	PEX13	1.02484
C07	17	C	7	UPS1	1.74738
C08	17	C	8	0	1.12934
C09	17	C	9	PBA1	1.03717
C10	17	C	10	YKE2	1.32006
C11	17	C	11	COQ9	1.19031
C12	17	C	12	0	1.29918
D01	17	D	1	MSS51	1.34809
D02	17	D	2	QRI5	1.13355
D03	17	D	3	HMX1	0.994924
D04	17	D	4	ENT2	1.16717
D05	17	D	5	HRD3	1.11592
D06	17	D	6	PNP1	1.15891
D07	17	D	7	CLB4	0.886795
D08	17	D	8	ATG38	0.98603
D09	17	D	9	CRR1	0.909205
D10	17	D	10	FRE1	1.07699
D11	17	D	11	CPR6	0.981432
D12	17	D	12	0	0.840873
E01	17	E	1	COA4	1.77309
E02	17	E	2	MSC3	1.12202
E03	17	E	3	CCC1	1.10337
E04	17	E	4	RSA3	1.49341
E05	17	E	5	0	0.928798
E06	17	E	6	0	1.10983
E07	17	E	7	ADY4	1.10372
E08	17	E	8	MET14	1.04331
E09	17	E	9	DID4/VPS2	6.73228
E10	17	E	10	MRP17	0.941311
E11	17	E	11	RPL14A	1.14307
E12	17	E	12	CAP1	0.789712
F01	17	F	1	LAC1	1.13049
F02	17	F	2	MRT4	1.35832
F03	17	F	3	UFD4	1.21392
F04	17	F	4	CCE1	1.59949
F05	17	F	5	PUT3	0.98316
F06	17	F	6	ATP7	1.89345
F07	17	F	7	HCS1	1.09164
F08	17	F	8	SPT23	1.01289
F09	17	F	9	0	1.23329
F10	17	F	10	PAN3	0.977837
F11	17	F	11	GPX1	0.929377
F12	17	F	12	TCD2	0.943417
G01	17	G	1	MAE1	1.12859
G02	17	G	2	0	1.27774
G03	17	G	3	IXR1	0.960372
G04	17	G	4	TUL1	1.22369
G05	17	G	5	AIM26	1.06981
G06	17	G	6	RGT1	1.18727
G07	17	G	7	PTM1	1.24496
G08	17	G	8	NFU1	1.17016
G09	17	G	9	VPS24	7.92818
G10	17	G	10	PHD1	1.03413
G11	17	G	11	WT	1
G12	17	G	12	DCW1	0.765035
H01	17	H	1	ANR2	1.75344
H02	17	H	2	SSH4	7.56589
H03	17	H	3	ELM1	1.57547
H04	17	H	4	0	0.896553
H05	17	H	5	SFK1	1.01432
H06	17	H	6	0	1.59216
H07	17	H	7	DEF1	1.27263
H08	17	H	8	OAR1	1.39929
H09	17	H	9	TMA19	0.963404
H10	17	H	10	NUP120	2.70014
H11	17	H	11	BLI1	0.784351
H12	17	H	12	MSN4	0.905911
A01	18	A	1	0	1.42662			H	G	F	E	D	C	B	A
A02	18	A	2	MNR2	1.48108		1	0.987289	0.9665	1.03689	1.66195	1.252	1.1594	1.25478	1.42662
A03	18	A	3	YET1	1.34443		2	1.11822	1.13039	1.14019	5.92287	1.34355	1.40394	1.32277	1.48108
A04	18	A	4	0	2.58946		3	1	1.05543	1.1077	1.03344	1.61249	1.29666	1.5626	1.34443
A05	18	A	5	YNK1	1.98482		4	1.19599	1.09961	1.00033	1.19006	1.33625	1.42873	2.02541	2.58946
A06	18	A	6	NUP100	1.22315		5	1.16215	1.31663	1.13146	1.25307	1.55098	1.30962	7.07414	1.98482
A07	18	A	7	0	1.67836		6	1.42173	1.11599	1.42693	1.16415	1.4103	1.10413		1.22315
A08	18	A	8	0	1.35408		7	1.28968	1.08995	1.09226	1.251	1.25788	1.17019	6.87997	1.67836
A09	18	A	9	0	1.46962		8	0.906562	1.41159	1.2895	1.25793	1.33433	1.2992	1.27785	1.35408
A10	18	A	10	STB6	1.37509		9	1.22592	1.20788	1.20305	1.2364	1.58627	1.39109	1.6151	1.46962
A11	18	A	11	LHS1	1.5839		10	1.04106	1.05818	1.24544	1.23912		1.11797	1.69836	1.37509
A12	18	A	12	MUD2	1.23975		11	1.21002	1.15327	0.932361	1.43599	1.09263	1.89867	1.82179	1.5839
B01	18	B	1	0	1.25478		12	1.12544	1.22289	1.09393	1.3692	1.61805	1.12164	1.27726	1.23975
B02	18	B	2	PSY1	1.32277
B03	18	B	3	0	1.5626
B04	18	B	4	SMY1	2.02541
B05	18	B	5	VMA5	7.07414
B07	18	B	7	TEF4	6.87997
B08	18	B	8	HOT13	1.27785
B09	18	B	9	MDH1	1.6151
B10	18	B	10	SRX1	1.69836
B11	18	B	11	CYT2	1.82179
B12	18	B	12	CUE2	1.27726
C01	18	C	1	0	1.1594
C02	18	C	2	BUD2	1.40394
C03	18	C	3	MBR1	1.29666
C04	18	C	4	YJU3	1.42873
C05	18	C	5	CWP1	1.30962
C06	18	C	6	0	1.10413
C07	18	C	7	MTC2	1.17019
C08	18	C	8	YPF1	1.2992
C09	18	C	9	HSL1	1.39109
C10	18	C	10	0	1.11797
C11	18	C	11	APE1	1.89867
C12	18	C	12	SEG2	1.12164
D01	18	D	1	AAT1	1.252
D02	18	D	2	0	1.34355
D03	18	D	3	HAP4	1.61249
D04	18	D	4	KTI12	1.33625
D05	18	D	5	RAD27	1.55098
D06	18	D	6	APN1	1.4103
D07	18	D	7	PRR1	1.25788
D08	18	D	8	SBA1	1.33433
D09	18	D	9	0	1.58627
D11	18	D	11	OAC1	1.09263
D12	18	D	12	DGR2	1.61805
E01	18	E	1	0	1.66195
E02	18	E	2	SSH4	5.92287
E03	18	E	3	YPK1	1.03344
E04	18	E	4	PGM1	1.19006
E05	18	E	5	PMU1	1.25307
E06	18	E	6	MYO3	1.16415
E07	18	E	7	SHE2	1.251
E08	18	E	8	0	1.25793
E09	18	E	9	RMA1	1.2364
E10	18	E	10	0	1.23912
E11	18	E	11	OCT1	1.43599
E12	18	E	12	APL2	1.3692
F01	18	F	1	0	1.03689
F02	18	F	2	CMC1	1.14019
F03	18	F	3	MRPL31	1.1077
F04	18	F	4	TGL1	1.00033
F05	18	F	5	MRP8	1.13146
F06	18	F	6	LTV1	1.42693
F07	18	F	7	AVT3	1.09226
F08	18	F	8	0	1.2895
F09	18	F	9	SDH1	1.20305
F10	18	F	10	DBR1	1.24544
F11	18	F	11	MCR1	0.932361
F12	18	F	12	0	1.09393
G01	18	G	1	SUE1	0.9665
G02	18	G	2	RPS27A	1.13039
G03	18	G	3	APE2	1.05543
G04	18	G	4	nA	1.09961
G05	18	G	5	RCN1	1.31663
G06	18	G	6	ELF1	1.11599
G07	18	G	7	KDX1	1.08995
G08	18	G	8	0	1.41159
G09	18	G	9	PIR3	1.20788
G10	18	G	10	PIR1	1.05818
G11	18	G	11	TPK3	1.15327
G12	18	G	12	MRP49	1.22289
H01	18	H	1	KKQ8	0.987289
H02	18	H	2	0	1.11822
H03	18	H	3	WT	1
H04	18	H	4	MRPL38	1.19599
H05	18	H	5	NNK1	1.16215
H06	18	H	6	TPO5	1.42173
H07	18	H	7	ZRT3	1.28968
H08	18	H	8	LST4	0.906562
H09	18	H	9	0	1.22592
H10	18	H	10	STE3	1.04106
H11	18	H	11	COY1	1.21002
H12	18	H	12	LOT5	1.12544
A01	19	A	1	SSH4	6.88859			H	G	F	E	D	C	B	A
A02	19	A	2	ASH1	1.89837		1	1.782	1.12219	1.33079	1.15025	1.23121	2.04732	1.70101	6.88859
A03	19	A	3	FAT3	1.63257		2		1.0192	1.09618	1.5619	1.24864	1.42373	1.69746	1.89837
A04	19	A	4	PXA2	2.02509		3	2.86853	1.20275	1.27719	1.52376	2.43689	3.19317	1.82801	1.63257
A05	19	A	5	CNB1	1.83668		4	1.01563	1.09842	1.08786	1.37511	1.23549	1.49005	1.94419	2.02509
A06	19	A	6	RPS25A	1.90254		5	1.04879	0.903792	1.19656	1.84252	2.43595	1.54343	1.70997	1.83668
A07	19	A	7	IMO32	1.47806		6	0.926018	1.07697	1.13891		1.20989	1.53691	1.72532	1.90254
A08	19	A	8	TIM21	1.4716		7	1.27122	1.0507	1.10856	10.4316	1.26572	1.56224		1.47806
A09	19	A	9	RPL26B	1.30741		8	0.9913	0.954761	1.14243		1.65079	1.39618	1.39819	1.4716
A10	19	A	10	0	1.77428		9	0.969994	1	1.05033	1.19782	1.26986	1.24793	1.50175	1.30741
A11	19	A	11	CAX4	4.59876		10	1.05193	1.26727	5.89604	1.15883	1.18709	1.28788	1.3825	1.77428
A12	19	A	12	ACB1	1.44159		11	1.03464	0.996199	1.03946	1.22627	1.08577	1.21354	1.41905	4.59876
B01	19	B	1	0	1.70101		12	0.922662	1.12734	0.925068	1.17761	1.25212	1.13493	1.16798	1.44159
B02	19	B	2	BUD9	1.69746
B03	19	B	3	0	1.82801
B04	19	B	4	NQM1	1.94419
B05	19	B	5	RME1	1.70997
B06	19	B	6	0	1.72532
B08	19	B	8	SCM4	1.39819
B09	19	B	9	0	1.50175
B10	19	B	10	FMP48	1.3825
B11	19	B	11	0	1.41905
B12	19	B	12	MUP1	1.16798
C01	19	C	1	RSC1	2.04732
C02	19	C	2	LST7	1.42373
C03	19	C	3	PEF1	3.19317
C04	19	C	4	SPR3	1.49005
C05	19	C	5	ADE6	1.54343
C06	19	C	6	COX18	1.53691
C07	19	C	7	0	1.56224
C08	19	C	8	0	1.39618
C09	19	C	9	0	1.24793
C10	19	C	10	ART5	1.28788
C11	19	C	11	0	1.21354
C12	19	C	12	ROM1	1.13493
D01	19	D	1	ENV11	1.23121
D02	19	D	2	UPF3	1.24864
D03	19	D	3	MRPL25	2.43689
D04	19	D	4	PEX8	1.23549
D05	19	D	5	PAC10	2.43595
D06	19	D	6	0	1.20989
D07	19	D	7	TWF1	1.26572
D08	19	D	8	SLX9	1.65079
D09	19	D	9	MRP13	1.26986
D10	19	D	10	RPL11B	1.18709
D11	19	D	11	PDC6	1.08577
D12	19	D	12	CTT1	1.25212
E01	19	E	1	TPC1	1.15025
E02	19	E	2	ASK10	1.5619
E03	19	E	3	MDR1	1.52376
E04	19	E	4	PCP1	1.37511
E05	19	E	5	GTF1	1.84252
E07	19	E	7	VMA21	10.4316
E09	19	E	9	CLB1	1.19782
E10	19	E	10	CLB6	1.15883
E11	19	E	11	0	1.22627
E12	19	E	12	SHY1	1.17761
F01	19	F	1	RPS23A	1.33079
F02	19	F	2	MEP1	1.09618
F03	19	F	3	0	1.27719
F04	19	F	4	0	1.08786
F05	19	F	5	KTR1	1.19656
F06	19	F	6	CRC1	1.13891
F07	19	F	7	RAS1	1.10856
F08	19	F	8	PIN2	1.14243
F09	19	F	9	0	1.05033
F10	19	F	10	VAM3	5.89604
F11	19	F	11	RGS2	1.03946
F12	19	F	12	LEU9	0.925068
G01	19	G	1	INP53	1.12219
G02	19	G	2	0	1.0192
G03	19	G	3	CEX1	1.20275
G04	19	G	4	AZF1	1.09842
G05	19	G	5	0	0.903792
G06	19	G	6	TRS33	1.07697
G07	19	G	7	RTC5	1.0507
G08	19	G	8	GCY1	0.954761
G09	19	G	9	WT	1
G10	19	G	10	LEO1	1.26727
G11	19	G	11	UBP2	0.996199
G12	19	G	12	CAT5	1.12734
H01	19	H	1	IAH1	1.782
H03	19	H	3	RGA1	2.86853
H04	19	H	4	AFI1	1.01563
H05	19	H	5	ORT1	1.04879
H06	19	H	6	0	0.926018
H07	19	H	7	VPS17	1.27122
H08	19	H	8	EFT1	0.9913
H09	19	H	9	BAG7	0.969994
H10	19	H	10	IRC14	1.05193
H11	19	H	11	IDH2	1.03464
H12	19	H	12	SIA1	0.922662
A01	20	A	1	RUP1	1.45708			H	G	F	E	D	C	B	A
A02	20	A	2	0	2.03111		1	1.42136	0.980718	1.06714	1.13427	1.10384	1.33287	1.52922	1.45708
A03	20	A	3	SFL1	1.65842		2	5.38461		1.04208	1.16076	5.02296	1.26755	1.44782	2.03111
A04	20	A	4	ARP8	1.63799		3	1.06387	0.970839	1.11442	1.20055	1.28303	1.37577	1.8648	1.65842
A05	20	A	5	LSC1	1.48982		4	1.02191	1.24796	1.13593	1.33915	1.28055	2.25578	1.44496	1.63799
A06	20	A	6	ELG1	1.54637		5	1.16833	1.00017	1.18284	1.56901	1.09681	1.33238	1.6748	1.48982
A07	20	A	7	0	1.71815		6	1	1.34912		2.44112	1.24029	1.44362	1.44525	1.54637
A08	20	A	8	PDR5	1.31108		7	1.53158	1.23742	1.35712	2.21342	1.33949	1.15247	1.52974	1.71815
A09	20	A	9	SLP1	1.33644		8	1.10494	1.10049	1.28241	1.04454	1.90114	2.07697	1.5774	1.31108
A10	20	A	10	ISN1	1.58214		9	1.26955	1.23077	1.11338	1.22127	1.04314	1.1434		1.33644
A11	20	A	11	NFI1	1.52369		10	1.24109	1.72025	1.32112	1.08293	1.62503	1.23635	1.42612	1.58214
A12	20	A	12	PNS1	1.27687		11	1.08557	1.29707	0.991166	1.12759	1.2231		1.56985	1.52369
B01	20	B	1	YRR1	1.52922		12	1.13955	1.37256	1.08637	0.947563	1.39876	1.62331	1.28338	1.27687
B02	20	B	2	DDP1	1.44782
B03	20	B	3	GET4	1.8648
B04	20	B	4	SEY1	1.44496
B05	20	B	5	SWT1	1.6748
B06	20	B	6	RPS28A	1.44525
B07	20	B	7	0	1.52974
B08	20	B	8	0	1.5774
B10	20	B	10	YRM1	1.42612
B11	20	B	11	DCS2	1.56985
B12	20	B	12	ALE1	1.28338
C01	20	C	1	MPC54	1.33287
C02	20	C	2	GAC1	1.26755
C03	20	C	3	RPS30B	1.37577
C04	20	C	4	FYV12	2.25578
C05	20	C	5	SER1	1.33238
C06	20	C	6	GSP2	1.44362
C07	20	C	7	0	1.15247
C08	20	C	8	TUF1	2.07697
C09	20	C	9	MSB1	1.1434
C10	20	C	10	IES4	1.23635
C12	20	C	12	ULS1	1.62331
D01	20	D	1	THI72	1.10384
D02	20	D	2	PEX27	5.02296
D03	20	D	3	SLK19	1.28303
D04	20	D	4	LIP5	1.28055
D05	20	D	5	MCA1	1.09681
D06	20	D	6	BFR1	1.24029
D07	20	D	7	0	1.33949
D08	20	D	8	0	1.90114
D09	20	D	9	MRM1	1.04314
D10	20	D	10	HIS3	1.62503
D11	20	D	11	GEP3	1.2231
D12	20	D	12	PTP2	1.39876
E01	20	E	1	NPT1	1.13427
E02	20	E	2	MGM1	1.16076
E03	20	E	3	STE4	1.20055
E04	20	E	4	SAS5	1.33915
E05	20	E	5	SPR2	1.56901
E06	20	E	6	AIM41	2.44112
E07	20	E	7	RUD3	2.21342
E08	20	E	8	STE13	1.04454
E09	20	E	9	RCN2	1.22127
E10	20	E	10	MCT1	1.08293
E11	20	E	11	ODC2	1.12759
E12	20	E	12	DSC3	0.947563
F01	20	F	1	0	1.06714
F02	20	F	2	ISU2	1.04208
F03	20	F	3	HER1	1.11442
F04	20	F	4	MCP1	1.13593
F05	20	F	5	WTM2	1.18284
F07	20	F	7	MKK1	1.35712
F08	20	F	8	KIN4	1.28241
F09	20	F	9	RPL33B	1.11338
F10	20	F	10	IRC13	1.32112
F11	20	F	11	HES1	0.991166
F12	20	F	12	0	1.08637
G01	20	G	1	ABP140	0.980718
G03	20	G	3	MET7	0.970839
G04	20	G	4	SSP2	1.24796
G05	20	G	5	PUS7	1.00017
G06	20	G	6	DGA1	1.34912
G07	20	G	7	ENV9	1.23742
G08	20	G	8	SRL1	1.10049
G09	20	G	9	0	1.23077
G10	20	G	10	TUM1	1.72025
G11	20	G	11	TMA16	1.29707
G12	20	G	12	NAT5	1.37256
H01	20	H	1	OSW1	1.42136
H02	20	H	2	SSH4	5.38461
H03	20	H	3	HNT3	1.06387
H04	20	H	4	0	1.02191
H05	20	H	5	DSE3	1.16833
H06	20	H	6	WT	1
H07	20	H	7	RFM1	1.53158
H08	20	H	8	FSH3	1.10494
H09	20	H	9	0	1.26955
H10	20	H	10	HUA2	1.24109
H11	20	H	11	RDL1	1.08557
H12	20	H	12	RDL2	1.13955
A01	21	A	1	MPD1	1.4153			H	G	F	E	D	C	B	A
A02	21	A	2	0	1.31202		1	1.35329	1.15725	0.907238	1.21166	1.09851	1.17486	1.12567	1.4153
A03	21	A	3	REE1	1.31009		2	6.07708		0.981462	1.03291	1.24718	1.1238	1.23736	1.31202
A04	21	A	4	IMA5	1.2754		3	0.998728	1.05952	1.01854	1.02184	1.18174	1.13351	1.34077	1.31009
A07	21	A	7	OPT1	1.42516		4	1.11254	1.15766	0.954864	1.03301	1.17567	1.16369	1.46604	1.2754
A08	21	A	8	PEX2	1.61091		5	1.19103	1.16226	1.0188	1.11332	1.14092	1.30345	1.35826
A09	21	A	9	0	1.24781		6	1.16884	2.07553	1.08829	1.01514	1	1.17669	1.20418
A10	21	A	10	CBP1	1.22138		7	1.16989	1.31178	1.05611	1.03434	1.96684	1.3235	1.26426	1.42516
A11	21	A	11	NUC1	1.33796		8	1.07553	1.82921	1.09495	1.06256	1.12841	1.36129	1.32247	1.61091
A12	21	A	12	LAA1	1.45264		9	1.32275	1.16105	0.97893	1.2042	1.01962	1.07843		1.24781
B01	21	B	1	0	1.12567		10	1.25374	1.02185	1.33449	1.10759	4.87926	1.18927	1.4667	1.22138
B02	21	B	2	nA	1.23736		11	1.04334	0.984573	1.33487	1.24851	1.31538	1.36018	1.20388	1.33796
B03	21	B	3	RCY1	1.34077		12	1.1039	1.02671	1.06726	0.96696	1.0086	1.48842	1.13076	1.45264
B04	21	B	4	ECM25	1.46604
B05	21	B	5	ACO2	1.35826
B06	21	B	6	MBB1	1.20418
B07	21	B	7	PHO90	1.26426
B08	21	B	8	UBP12	1.32247
B09	21	B	10	ELO1	1.4667
B10	21	B	11	0	1.20388
B11	21	B	12	SOP4	1.13076
B12	21	C	1	RPS14B	1.17486
C01	21	C	2	RPS22A	1.1238
C02	21	C	3	RPL39	1.13351
C03	21	C	4	BUD19	1.16369
C04	21	C	5	SWE1	1.30345
C05	21	C	6	MNN5	1.17669
C06	21	C	7	ATG36	1.3235
C07	21	C	8	MNN11	1.36129
C08	21	C	9	0	1.07843
C09	21	C	10	0	1.18927
C10	21	C	11	ATP12	1.36018
C11	21	C	12	PFD1	1.48842
C12	21	D	1	ATG27	1.09851
D01	21	D	2	SWI3	1.24718
D02	21	D	3	CPS1	1.18174
D03	21	D	4	0	1.17567
D04	21	D	5	ASG7	1.14092
D05	21	D	6	WT	1
D06	21	D	7	SET2	1.96684
D07	21	D	8	QCR8	1.12841
D09	21	D	9	HAL5	1.01962
D10	21	D	10	TPK1	4.87926
D11	21	D	11	0	1.31538
D12	21	D	12	JJJ2	1.0086
E01	21	E	1	FMP33	1.21166
E02	21	E	2	HSP150	1.03291
E03	21	E	3	CIS3	1.02184
E04	21	E	4	FAR1	1.03301
E05	21	E	5	FBP26	1.11332
E06	21	E	6	VPS35	1.01514
E07	21	E	7	INO1	1.03434
E08	21	E	8	0	1.06256
E09	21	E	9	SNA3	1.2042
E10	21	E	10	0	1.10759
E11	21	E	11	DAS1	1.24851
E12	21	E	12	RPA34	0.96696
F01	21	F	1	MRX5	0.907238
F02	21	F	2	IDS2	0.981462
F03	21	F	3	SFH5	1.01854
F04	21	F	4	0	0.954864
F05	21	F	5	IRC9	1.0188
F06	21	F	6	RPB4	1.08829
F07	21	F	7	YUR1	1.05611
F08	21	F	8	TIF2	1.09495
F09	21	F	9	0	0.97893
F10	21	F	10	LCB3	1.33449
F11	21	F	11	MRS3	1.33487
F12	21	F	12	0	1.06726
G01	21	G	1	AIM23	1.15725
G03	21	G	3	TRK1	1.05952
G04	21	G	4	PEX30	1.15766
G05	21	G	5	RPL38	1.16226
G06	21	G	6	0	2.07553
G07	21	G	7	TMA10	1.31178
G08	21	G	8	NMA1	1.82921
G09	21	G	9	REC102	1.16105
G10	21	G	10	CHS5	1.02185
G11	21	G	11	JIP3	0.984573
G12	21	G	12	MID2	1.02671
H01	21	H	1	RPS25B	1.35329
H02	21	H	2	SSH4	6.07708
H03	21	H	3	NUP2	0.998728
H04	21	H	4	SPO77	1.11254
H05	21	H	5	FKS1	1.19103
H06	21	H	6	RPL26A	1.16884
H07	21	H	7	0	1.16989
H08	21	H	8	DIC1	1.07553
H09	21	H	9	0	1.32275
H10	21	H	10	ORM2	1.25374
H11	21	H	11	NIT3	1.04334
H12	21	H	12	0	1.1039
A01	22	A	1	BUD8	1.99124			H	G	F	E	D	C	B	A
A02	22	A	3	ATG33	2.00899		1	1	0.893769	1.06428		1.19128	1.33257	1.97732	1.99124
A03	22	A	4	RSC2	2.02259		2		1.13932		1.19742	1.42841	1.3236
A04	22	A	5	SSH4	5.79838		3			1.24521	1.26884	1.4316	1.55332	1.69785	2.00899
A07	22	A	7	NMD4	2.2514		4		1.04754	1.22173		1.3221	1.47959	1.84054	2.02259
A08	22	A	8	GRX8	2.10121		5		0.968898	1.12129	1.1869	1.41042		1.76446	5.79838
A09	22	A	9	0	2.0968		6	0.980994	1.02589		1.35954	1.27604	1.5691	1.40907
A10	22	A	10	0	1.84013		7	0.919952	0.959899		1.05313	2.0275	1.52376	1.71469	2.2514
A11	22	A	11	RPS22B	1.97239		8	1.04818	1.11173	1.08462	1.2638	1.41993	1.43333	1.50706	2.10121
A12	22	A	12	MDM30	1.31159		9	1.05853	0.996662	1.14063	1.28551	1.12799	1.51367	1.58121	2.0968
B01	22	B	1	ROM2	1.97732		10	1.01192	0.978446	1.05721	1.65474	8.32552	1.29201		1.84013
B03	22	B	3	VID22	1.69785		11	1.28147	1.1163	1.24518	1.31713	1.76898	1.4808	1.44046	1.97239
B04	22	B	4	0	1.84054		12	1.05119	0.997065	1.22986	1.23746	1.14961	1.53855	1.40242	1.31159
B05	22	B	5	STP3	1.76446
B06	22	B	6	PSY3	1.40907
B07	22	B	7	FBP1	1.71469
B08	22	B	8	CSR1	1.50706
B09	22	B	9	CTF3	1.58121
B11	22	B	11	IKI3	1.44046
B12	22	B	12	SWC7	1.40242
C01	22	C	1	VAC14	1.33257
C02	22	C	2	REH1	1.3236
C03	22	C	3	RPS29A	1.55332
C04	22	C	4	ECM19	1.47959
C06	22	C	6	ATP10	1.5691
C07	22	C	7	COX8	1.52376
C08	22	C	8	SKI2	1.43333
C09	22	C	9	0	1.51367
C10	22	C	10	DUS3	1.29201
C11	22	C	11	0	1.4808
C12	22	C	12	SEI1	1.53855
D01	22	D	1	DUS4	1.19128
D02	22	D	2	0	1.42841
D03	22	D	3	BLS1	1.4316
D04	22	D	4	VIP1	1.3221
D05	22	D	5	BER1	1.41042
D06	22	D	6	INA1	1.27604
D07	22	D	7	PUN1	2.0275
D08	22	D	8	0	1.41993
D09	22	D	9	0	1.12799
D10	22	D	10	VPS36	8.32552
D11	22	D	11	CDC73	1.76898
D12	22	D	12	RPN13	1.14961
E02	22	E	2	BNA5	1.19742
E03	22	E	3	0	1.26884
E05	22	E	5	TOP3	1.1869
E06	22	E	6	0	1.35954
E07	22	E	7	0	1.05313
E08	22	E	8	FAR10	1.2638
E09	22	E	9	LIP2	1.28551
E10	22	E	10	CSC1	1.65474
E11	22	E	11	ARV1	1.31713
E12	22	E	12	IRC20	1.23746
F01	22	F	1	RCK2	1.06428
F03	22	F	3	SYM1	1.24521
F04	22	F	4	0	1.22173
F05	22	F	5	MCP2	1.12129
F08	22	F	8	0	1.08462
F09	22	F	9	GSY2	1.14063
F10	22	F	10	LCB5	1.05721
F11	22	F	11	VPS63	1.24518
F12	22	F	12	YPT6	1.22986
G01	22	G	1	RED1	0.893769
G02	22	G	2	RPS28B	1.13932
G04	22	G	4	PDR8	1.04754
G05	22	G	5	BOP2	0.968898
G06	22	G	6	SEC22	1.02589
G07	22	G	7	0	0.959899
G08	22	G	8	DCS1	1.11173
G09	22	G	9	0	0.996662
G10	22	G	10	PIG1	0.978446
G11	22	G	11	0	1.1163
G12	22	G	12	0	0.997065
H01	22	H	1	WT	1
H06	22	H	6	ECI1	0.980994
H07	22	H	7	NNT1	0.919952
H08	22	H	8	0	1.04818
[truncated: 2,778 more rows]

## Sheet: Sorted list
Mutant Name	Fold change in fluorescence intensity
0	0.458742
DUF1	0.557566
0	0.585213
ACF4	0.627298
YOR1	0.654961
ISA1	0.66339
URA8	0.665788
nA	0.676517
DLS1	0.676693
BUD4	0.680654
RBS1	0.690671
BGL2	0.696417
HBS1	0.69747
STR2	0.716647
0	0.718539
MDM32	0.726828
EMC2	0.727994
TGL4	0.735092
HHF2	0.741322
ABM1	0.743515
0	0.747275
ADO1	0.7481
0	0.748983
0	0.757291
DCW1	0.765035
SPC1	0.766008
NUP84	0.766743
GRE1	0.767767
0	0.770688
AVT1	0.771458
TES1	0.776241
0	0.780957
0	0.781896
MET2	0.783892
BLI1	0.784351
CAP1	0.789712
MHO1	0.790807
TVP38	0.794602
PBI1	0.797907
CYS3	0.79981
LDS2	0.817477
RPL16B	0.820353
MLS1	0.824943
CGR1	0.82956
PXL1	0.829802
0	0.830001
0	0.83063
DAL5	0.834722
YIH1	0.835089
0	0.83569
ZUO1	0.83696
0	0.838805
nA	0.839582
OPI10	0.839698
0	0.840873
PHO89	0.843972
HUT1	0.845291
PEX19	0.847721
GTT1	0.84881
OCA2	0.84974
0	0.851453
UFD2	0.854127
OST4	0.856707
VIK1	0.860302
0	0.861027
MDE1	0.863705
0	0.86552
0	0.866376
MCH1	0.867505
TOM70	0.869093
RPB4	0.869391
0	0.869602
nA	0.870614
0	0.870826
ENV7	0.871023
CSM1	0.873104
EFM3	0.873166
RPL6A	0.873339
ECM4	0.875237
MIR1	0.875479
0	0.8755
RSF2	0.87699
VBA2	0.877021
0	0.878953
THI21	0.879395
MUD1	0.880753
0	0.881235
DAL3	0.883298
PMD1	0.883396
HPM1	0.883468
0	0.884403
BOI1	0.884457
USV1	0.886023
CLB4	0.886795
VID24	0.890072
SIL1	0.890814
0	0.890837
SAM4	0.891733
AIM29	0.892222
RED1	0.893769
SRL3	0.894552
EAF6	0.896395
0	0.896553
ADK2	0.898056
MRPL27	0.899403
ATG34	0.899767
DLD1	0.901221
OMA1	0.901665
YUH1	0.901988
HST1	0.902651
nA	0.902719
0	0.903792
0	0.904403
0	0.905079
MSN4	0.905911
LST4	0.906562
CIN2	0.907035
0	0.907091
MRX5	0.907238
AHA1	0.907716
CCW14	0.908267
SSZ1	0.90865
CRR1	0.909205
MPD2	0.909583
NDE2	0.909781
FYV6	0.910868
MAM3	0.912767
0	0.913103
GRX4	0.915605
nA	0.915664
GAL4	0.916244
LYS20	0.91651
0	0.917012
NNT1	0.919952
0	0.920629
SIA1	0.922662
BIO5	0.923837
nA	0.924369
THI20	0.924477
LEU9	0.925068
BUD16	0.92521
0	0.926018
0	0.927116
0	0.927502
nA	0.9282
STP4	0.928229
ENT1	0.928519
0	0.928737
0	0.928798
GPX1	0.929377
0	0.929439
0	0.930091
INP54	0.930802
PUS4	0.931133
ADR1	0.93124
MCR1	0.932361
RKM2	0.932758
SHC1	0.932888
PCK1	0.933453
0	0.934228
YIP4	0.935139
0	0.937208
ECM8	0.938501
TAT1	0.938871
0	0.939186
EMI1	0.940039
SLM4	0.940294
APM1	0.940535
MRP17	0.941311
YPT52	0.941941
0	0.942814
TCD2	0.943417
GPD2	0.943721
FSF1	0.944932
0	0.946128
RRT8	0.946465
DSC3	0.947563
GYP5	0.947628
GPM3	0.948698
0	0.950564
RAD18	0.950602
SSO1	0.951419
DAL81	0.951497
UPC2	0.952103
0	0.952294
0	0.952496
BSD2	0.953568
0	0.953746
IDP1	0.953984
CMR3	0.954383
GCY1	0.954761
HIS2	0.954827
0	0.954864
nA	0.956372
PTC6	0.956951
0	0.957408
UBP11	0.957824
RPS16B	0.958143
0	0.958822
CAF4	0.959104
DSD1	0.959415
0	0.959899
IXR1	0.960372
VFA1	0.960753
PRM7	0.961024
WHI4	0.961411
0	0.961853
RDH54	0.96215
AVT6	0.962674
TMA19	0.963404
VHS1	0.963643
FAR11	0.963745
REX4	0.964349
0	0.965601
SUE1	0.9665
0	0.966786
RPA34	0.96696
UBP16	0.966963
RNH201	0.967041
UBP14	0.967091
EMI2	0.967109
IMA1	0.968099
BOP2	0.968898
PHO3	0.969083
ACM1	0.969174
GAT4	0.969944
BAG7	0.969994
0	0.970151
MFG1	0.970262
MIS1	0.970396
MET7	0.970839
THO2	0.970945
YPK2	0.971099
STF2	0.971138
TBS1	0.971155
DIP5	0.971558
VMR1	0.972026
MFA2	0.972195
PDP3	0.972301
MEP2	0.972802
GEF1	0.973333
YAR1	0.973337
COS6	0.974148
MSN2	0.974335
0	0.9745
GPR1	0.974588
SHB17	0.97473
CMR1	0.975182
KEL3	0.975477
RAD16	0.976535
YHI9	0.976731
TEC1	0.976982
BRE4	0.977431
PAN3	0.977837
TPO4	0.978022
0	0.978213
PIG1	0.978446
0	0.97893
PLM2	0.979067
FTR1	0.980592
ABP140	0.980718
APL1	0.980784
ECI1	0.980994
CPR6	0.981432
IDS2	0.981462
GAS5	0.981674
UPS3	0.982159
SAS4	0.982284
PUT3	0.98316
SNF6	0.983344
NUP42	0.983579
JIP3	0.984573
RAD5	0.984714
0	0.984735
MBF1	0.98488
0	0.984953
0	0.985207
GAP1	0.9857
ATG38	0.98603
0	0.98615
RAD61	0.986392
nA	0.987088
RCR1	0.987267
KKQ8	0.987289
GTR1	0.987621
ARC18	0.988156
STE20	0.988182
ERP3	0.988859
SAM1	0.989038
PHM7	0.989256
RPL35A	0.989623
CRT10	0.989779
0	0.990164
BY4741	0.990218
FMP45	0.990729
FZF1	0.99111
HES1	0.991166
EFT1	0.9913
0	0.991368
0	0.991383
EST3	0.992081
0	0.992141
0	0.992215
YPS5	0.992531
FRE2	0.992949
EFM5	0.993269
RPS12	0.993369
0	0.994067
HMX1	0.994924
RPS14A	0.99545
ARO4	0.99553
DTD1	0.996039
UBP2	0.996199
YMR1	0.996268
MTQ1	0.996275
0	0.996662
TMA22	0.996683
0	0.997025
0	0.997065
UGA2	0.997987
UGX2	0.998197
EMI1	0.998197
0	0.99849
HBT1	0.99854
nA	0.998616
NUP2	0.998728
CRD1	0.998873
0	0.998884
0	0.998894
UGA3	0.998975
OCA5	0.999426
MIX23	0.999786
PUS7	1.00017
TGL1	1.00033
PFA3	1.00061
0	1.00092
RPL40B	1.00092
PEX5	1.00156
NRK1	1.00224
nA	1.00234
SSM4	1.00311
MCM22	1.00334
PHO13	1.00339
MDS3	1.00394
TAD1	1.00399
AIM3	1.00418
RAD24	1.00439
0	1.00458
CBR1	1.00465
GRH1	1.00509
0	1.00544
GAL3	1.00582
AQR1	1.00585
SKG1	1.00618
LYS12	1.00622
SHO1	1.00688
HSP78	1.00706
BCH2	1.0074
HMS2	1.00777
NOP12	1.00817
0	1.00819
JJJ2	1.0086
EAF7	1.00866
SLC1	1.00921
ANP1	1.00931
GUD1	1.00978
MDM38	1.00986
NTH2	1.01066
SAM3	1.01067
RMR1	1.01109
0	1.0111
HOC1	1.01133
CWP2	1.01141
MEC3	1.01192
TOS2	1.01203
SPT23	1.01289
0	1.01306
YAK1	1.0137
GCN3	1.01425
SFK1	1.01432
RMD5	1.01436
0	1.01454
IRC6	1.01458
NGL1	1.01462
VPS35	1.01514
0	1.0152
BNA3	1.01524
AFI1	1.01563
SOL4	1.01604
LPP1	1.01647
GYP7	1.0166
nA	1.01667
PEX11	1.01677
0	1.0169
MIC19	1.0169
BIO3	1.01758
ANB1	1.01765
FMP46	1.0177
AVO2	1.01776
SNO4	1.0179
AST2	1.01807
NAP1	1.01835
LAG2	1.01843
SFH5	1.01854
MET10	1.01862
IRC9	1.0188
ELP4	1.01914
0	1.0192
APM4	1.0196
HAL5	1.01962
PUS9	1.01996
RIM4	1.02077
ECM15	1.02078
IFA38	1.02123
0	1.02163
CIS3	1.02184
CHS5	1.02185
0	1.02191
YSC84	1.02206
nA	1.02213
DAL1	1.02246
0	1.02266
0	1.02281
CRP1	1.02337
RPS26B	1.0235
HRK1	1.0236
ALG5	1.02365
CCW12	1.02374
0	1.0246
0	1.02467
nA	1.02469
PEX13	1.02484
RTT10	1.02487
SMF3	1.02565
MRX3	1.02576
0	1.02583
SEC22	1.02589
UBP6	1.02666
MID2	1.02671
IKS1	1.02748
0	1.02779
YSA1	1.02818
0	1.02866
0	1.02886
0	1.02887
SAP30	1.02893
GLG2	1.02898
YAP5	1.02908
PRS5	1.02929
GCS1	1.02954
0	1.03
GRX1	1.03034
KAR9	1.03085
RBD2	1.03088
0	1.03092
0	1.03129
GRX2	1.03175
CLB3	1.03271
HSP150	1.03291
FAR1	1.03301
0	1.03314
AIM6	1.03321
TDA10	1.03342
YPK1	1.03344
ELP2	1.03345
SPR6	1.0339
PHD1	1.03413
SKG3	1.03432
INO1	1.03434
GTB1	1.03437
0	1.03446
IDH2	1.03464
BIO4	1.03474
MNT2	1.03481
0	1.03525
0	1.03533
PAU23	1.03539
UGA1	1.03539
0	1.03546
PFK26	1.0357
ABF2	1.03596
DSF2	1.03622
0	1.03666
COS10	1.03675
0	1.03689
0	1.03691
RGT2	1.03705
PBA1	1.03717
IVY1	1.03723
DCG1	1.03746
0	1.03762
SRO77	1.03766
0	1.03776
CIN4	1.0378
0	1.03782
ATG26	1.03815
CAF40	1.03822
LPL1	1.03884
RGS2	1.03946
0	1.03954
CUS2	1.04029
HMG1	1.04086
PBY1	1.04099
STE3	1.04106
UBC7	1.04118
0	1.04118
AHC2	1.04145
TFS1	1.04196
ISU2	1.04208
DUG1	1.04224
PLP1	1.04255
0	1.0429
MRM1	1.04314
ESL2	1.04314
NPL6	1.04328
MET14	1.04331
NIT3	1.04334
DAK2	1.04366
0	1.04389
AIM17	1.0439
YSR3	1.04402
RPS23B	1.04409
PAU17	1.04409
LYS2	1.04421
AUA1	1.0443
0	1.04443
ATG19	1.04452
STE13	1.04454
HAL5	1.04472
DDI1	1.04483
RGI2	1.04489
KAP122	1.04544
DOA4	1.04574
RPS19A	1.04609
YAP7	1.04609
GRE2	1.04619
0	1.04685
TRM7	1.04704
MRK1	1.04718
PDR8	1.04754
0	1.04759
MSB2	1.04793
COM2	1.04808
0	1.04818
ISU1	1.04824
GIP3	1.04824
ORT1	1.04879
CAT2	1.04901
0	1.04985
0	1.05031
0	1.05033
SPO74	1.0507
RTC5	1.0507
HPR1	1.05088
UBC4	1.05089
CRF1	1.05099
RTC1	1.05114
COQ11	1.05119
PPS1	1.05125
PHO5	1.05168
FPR4	1.05193
IRC14	1.05193
TIP1	1.05218
CAF130	1.05255
0	1.0526
VID27	1.05263
0	1.05313
MTD1	1.05331
NBA1	1.05358
ECM21	1.05361
UBP1	1.05406
FRE5	1.05495
APE2	1.05543
0	1.0555
RKM5	1.05565
ERV41	1.05585
YUR1	1.05611
TGL5	1.0562
0	1.05641
CPR8	1.0566
0	1.05704
LCB5	1.05721
SSH1	1.05723
SLX4	1.05744
TRP1	1.05749
0	1.05754
PAA1	1.05808
PIR1	1.05818
GTS1	1.05824
nA	1.05853
MNT4	1.05867
PHO87	1.05871
BUD21	1.05892
SFT2	1.0591
0	1.05935
RPA14	1.05944
MPC3	1.05945
TRK1	1.05952
MOG1	1.06064
GCG1	1.06085
GND1	1.0612
0	1.06121
GLY1	1.0615
RPS7B	1.06211
RPL8A	1.06229
0	1.06256
0	1.06275
KGD2	1.0629
VHC1	1.06322
FMP23	1.06331
0	1.06343
0	1.06344
EHD3	1.06355
SMA2	1.06363
0	1.06366
GRS1	1.06376
SAP4	1.06379
HNT3	1.06387
RCK2	1.06428
EBS1	1.06432
SNQ2	1.06443
0	1.0645
SSB1	1.06457
0	1.06478
SDH4	1.06503
GAL11	1.06517
ERV2	1.0652
PCT1	1.06521
DCI1	1.06535
YCH1	1.06537
JJJ3	1.06594
ASI1	1.06604
0	1.06634
WAR1	1.06639
0	1.06676
TOM5	1.06676
0	1.06714
0	1.06726
0	1.06756
BBC1	1.0677
TDH2	1.06773
EAR1	1.0679
DIA1	1.06791
MSG5	1.06811
ICY2	1.06826
DAP1	1.06828
YVC1	1.06836
ARO3	1.0684
TIF4631	1.06893
YAP1	1.06969
AIM26	1.06981
MNN4	1.07002
PHO81	1.07024
RXT3	1.0704
ADH4	1.0711
0	1.07117
SPO75	1.07118
PSK2	1.0712
LYP1	1.07123
WHI5	1.07125
DDR48	1.07131
PFF1	1.07188
PEX31	1.07245
IGO2	1.07254
AMF1	1.07277
SNZ2	1.0729
ZNF1	1.07292
0	1.07308
0	1.07315
0	1.07318
BNA2	1.07377
MAM1	1.07385
nA	1.07385
SIW14	1.07401
PEX15	1.07469
0	1.07498
0	1.07502
YHB1	1.07505
COS12	1.07523
RAD23	1.07538
DIC1	1.07553
PET10	1.07564
SPO11	1.07567
0	1.07623
0	1.07675
PIN3	1.07687
TRS33	1.07697
FRE1	1.07699
HSP42	1.07701
0	1.0771
ADH2	1.07797
0	1.07843
0	1.07849
RPL37B	1.07857
0	1.07868
MLP1	1.07872
0	1.07874
SPS2	1.07876
NTG2	1.07893
GPD1	1.079
0	1.07908
WSC2	1.07928
KIP2	1.07956
FAT1	1.07968
GCN5	1.07975
LSB3	1.08015
SDH5	1.08016
CHK1	1.08021
0	1.0803
YPR1	1.08057
TRP2	1.08132
UBS1	1.08146
LHP1	1.08196
0	1.08203
OPI1	1.08211
ETP1	1.08244
TOM6	1.08258
RPL13A	1.08259
MCT1	1.08293
0	1.0833
ERP1	1.08367
0	1.08391
PEX18	1.08409
0	1.0841
RIM9	1.08428
0	1.08433
0	1.08453
0	1.08462
ATP4	1.08472
MLH2	1.08478
LAS21	1.08491
ATH1	1.08537
RDL1	1.08557
0	1.0856
ATG9	1.0857
0	1.08572
PDC6	1.08577
HHT1	1.08585
0	1.08612
0	1.08637
COR1	1.08642
MAP2	1.08646
YIP5	1.08681
PRR2	1.08709
BUD30	1.08726
PET18	1.08733
SIS2	1.08748
IRC23	1.08766
0	1.08786
ATG29	1.08793
ARN2	1.08798
MHP1	1.08811
CIR1	1.08817
MRPL10	1.08827
RPB4	1.08829
EMP65	1.08834
GSM1	1.08843
TRX2	1.08922
PSH1	1.08953
EAF3	1.08955
PEX21	1.08962
ERG24	1.0899
KDX1	1.08995
0	1.09031
0	1.09031
SCP1	1.09054
RPS14B	1.09057
FRD1	1.09061
SLI1	1.09073
0	1.09134
HCS1	1.09164
HOP1	1.09187
AVT3	1.09226
0	1.09262
OAC1	1.09263
PHB1	1.09269
TAZ1	1.09274
RAD4	1.09302
RPS9A	1.09312
CSI1	1.09338
MCH4	1.09366
NTO1	1.09388
0	1.09393
0	1.09406
HHT2	1.0943
0	1.09455
XRS2	1.09492
TIF2	1.09495
0	1.09499
SLF1	1.09507
GSF2	1.0951
0	1.09521
HLR1	1.09528
0	1.09534
HAA1	1.09538
0	1.09576
0	1.09581
0	1.09592
NRM1	1.096
PUT1	1.0961
MEP1	1.09618
0	1.09626
0	1.09628
ATG1	1.09649
PLB2	1.09651
SSK2	1.09668
MCA1	1.09681
IOC3	1.09708
0	1.09713
0	1.09749
MRPL20	1.09762
MKT1	1.09815
0	1.09826
SKI7	1.09831
GDH2	1.09833
AZF1	1.09842
ATG27	1.09851
TCM62	1.09871
nA	1.09903
SBP1	1.0991
FMP33	1.09914
AIM21	1.09961
nA	1.09961
TEL1	1.09977
0	1.09984
TCB2	1.09998
0	1.1003
FMP16	1.10033
SRL1	1.10049
AMD1	1.10056
NMA111	1.10057
FPR1	1.10099
0	1.10101
TRK2	1.10133
SPO23	1.10138
HSP26	1.10138
GRE2	1.10142
SOK1	1.10154
nA	1.10163
CMK1	1.10167
MET22	1.10167
0	1.10182
IPT1	1.10183
HIS1	1.10187
MGA1	1.10195
SUC2	1.10219
SET4	1.10227
FPR2	1.10251
MUM2	1.10282
CCC1	1.10337
0	1.10362
ADY4	1.10372
THI72	1.10384
MMS4	1.10388
0	1.1039
nA	1.10411
0	1.10413
0	1.10431
TEP1	1.10468
FSH3	1.10494
GEX2	1.10509
0	1.10513
YPT53	1.10545
HXT14	1.10546
PAU11	1.10564
0	1.10566
STE7	1.10571
VOA1	1.10605
ARN1	1.10631
0	1.10654
ELO1	1.10675
TAH1	1.10685
YKE4	1.10731
PAU13	1.10747
0	1.10759
MPC2	1.10766
MRPL31	1.1077
SOL3	1.10777
0	1.10785
0	1.10787
0	1.10841
RAS1	1.10856
NMA2	1.10863
NFT1	1.10863
OST5	1.10888
0	1.10958
0	1.10983
OM14	1.10996
0	1.11052
0	1.11113
ACS1	1.11126
ERV29	1.1115
ULI1	1.11155
DCS1	1.11173
nA	1.11209
MIG3	1.11239
SPO77	1.11254
PRM6	1.11291
FBP26	1.11332
RPL33B	1.11338
ESC8	1.1134
0	1.11418
HER1	1.11442
SVP26	1.11448
0	1.11455
UBP9	1.11554
MRS4	1.1157
0	1.11586
HRD3	1.11592
ELF1	1.11599
RTR2	1.11605
HFM1	1.11605
0	1.1163
RPS0A	1.11672
BUD17	1.11676
MRX4	1.11701
ERC1	1.11752
0	1.11777
IES1	1.11781
AIM39	1.11781
RDR1	1.11784
0	1.11797
RTN2	1.118
MRX6	1.11821
0	1.11822
TAT2	1.11857
RPS11B	1.11872
0	1.11901
0	1.11953
OSH6	1.11986
0	1.11992
CCS1	1.11999
0	1.12026
0	1.12052
PLB1	1.12079
CAF120	1.12091
0	1.12111
AIM11	1.12114
MCP2	1.12129
ARP5	1.1213
SEG2	1.12164
0	1.12186
CUL3	1.12187
DAL80	1.12197
BY4741	1.12198
MSC3	1.12202
GCN1	1.12206
PAM17	1.12211
INP53	1.12219
0	1.12228
PPH3	1.12237
SPO19	1.12265
0	1.12267
0	1.1228
TAX4	1.12288
SAT4	1.12299
THI3	1.12305
FLR1	1.12306
ADE5,7	1.12316
HXK2	1.1232
SSE1	1.12321
ATG7	1.12326
RIM21	1.12352
MRX7	1.12361
ATG22	1.12363
RPS22A	1.1238
PAR32	1.12411
UIP5	1.12413
SPO20	1.12415
0	1.12418
FLO1	1.12426
MKS1	1.12457
0	1.1247
GLT1	1.12495
GPP1	1.12535
LOT5	1.12544
0	1.12567
MPM1	1.12582
0	1.1259
DNF1	1.12604
ELP6	1.12606
SDH7	1.12625
TIF3	1.12629
RRT12	1.12638
SNN1	1.12661
nA	1.12661
TMA17	1.12694
RPN4	1.12694
CPR7	1.1273
CAT5	1.12734
0	1.12751
ODC2	1.12759
0	1.12799
HOL1	1.12816
RPP1B	1.12833
QCR8	1.12841
MAE1	1.12859
COQ6	1.12887
SPO13	1.12905
0	1.1291
0	1.12934
MRX12	1.12958
ARE2	1.12974
ARE1	1.12983
ICT1	1.1301
RAS2	1.1302
BIT2	1.13038
RPS27A	1.13039
AZR1	1.1304
KIP1	1.13044
LAC1	1.13049
ALR2	1.13067
0	1.13072
SOP4	1.13076
0	1.13089
MRP8	1.13146
MAG1	1.13176
0	1.13181
0	1.13205
TYW1	1.13211
RAD55	1.13218
GCN2	1.13237
BIT61	1.13241
RPL23B	1.13265
PHO2	1.13278
0	1.13278
RPL17B	1.13303
0	1.13322
MET1	1.13326
RPL39	1.13351
NPR1	1.13352
EMP47	1.13352
QRI5	1.13355
MGS1	1.13361
0	1.13373
RPL18B	1.13398
MSB3	1.13419
0	1.13421
NPT1	1.13427
SGA1	1.13433
0	1.13474
ROM1	1.13493
ECM34	1.13502
MET6	1.13518
MUP3	1.13546
0	1.13565
PAT1	1.13568
0	1.13584
MCP1	1.13593
PMA2	1.13617
SED1	1.13641
GIR2	1.13648
0	1.13649
ZRG17	1.13671
VBA5	1.13727
PIG2	1.13735
ARG7	1.13742
RAD51	1.13758
0	1.13775
QCR6	1.13783
CAR1	1.13787
SHU1	1.13815
MIC26	1.13825
SHU2	1.13885
CRC1	1.13891
MMT2	1.13891
0	1.13897
TCB1	1.13915
QDR3	1.13918
RPS28B	1.13932
RDL2	1.13955
KHA1	1.13961
0	1.13964
FRE7	1.13967
PEA2	1.1399
SSP1	1.13991
0	1.13991
SED4	1.14005
RMD1	1.14007
0	1.14007
CMC1	1.14019
GSY2	1.14063
0	1.1409
ASG7	1.14092
0	1.14139
FMS1	1.14145
HAM1	1.1415
YHC3	1.14168
RRI1	1.14172
MCH5	1.14227
PIN2	1.14243
SPI1	1.14245
0	1.14253
PDC5	1.14261
MDL2	1.1427
UBP5	1.14276
RPL14A	1.14307
MSB1	1.1434
0	1.14351
0	1.14372
SPO14	1.14409
PRX1	1.14414
APQ13	1.14523
0	1.14534
0	1.14549
0	1.14577
HUA1	1.14593
0	1.14596
YEH1	1.14627
0	1.14638
ITT1	1.1465
PET100	1.14652
TOS4	1.14662
DOM34	1.14683
MSO1	1.14696
0	1.14716
IZH2	1.14717
TOK1	1.14744
ROD1	1.14748
SAM37	1.14771
0	1.14789
GUP2	1.14814
REC8	1.14865
DAL82	1.14899
0	1.149
DCR2	1.14909
SMA1	1.14918
0	1.1494
RPN13	1.14961
JSN1	1.14986
IRC7	1.14989
0	1.14997
TPC1	1.15025
SPS100	1.15104
CWC21	1.15128
0	1.15142
TRX3	1.15143
YPS6	1.15147
GPA1	1.15149
ATF1	1.15184
0	1.15191
LEU3	1.15208
SET3	1.15228
0	1.15247
BSC5	1.15312
RBL2	1.1532
TPK3	1.15327
SLM5	1.15336
0	1.15352
PUF6	1.15398
0	1.15438
0	1.15442
PTP1	1.15449
0	1.15491
RPL2A	1.15499
GPT2	1.15503
MF(ALPHA)1	1.15511
0	1.15538
ABP1	1.15604
SRS2	1.15619
MAL33	1.15634
DIE2	1.15643
SKP2	1.15646
ATX2	1.15681
TRM2	1.15711
RRP8	1.15722
AIM23	1.15725
YOX1	1.15728
TOR1	1.15758
PEX30	1.15766
0	1.15767
MET5	1.15769
ECM2	1.15771
0	1.15783
YAP3	1.15796
0	1.1581
0	1.15832
MDH3	1.15869
MET28	1.15871
CLB6	1.15883
PNP1	1.15891
TOF2	1.15892
0	1.15896
SYN8	1.15911
0	1.15921
0	1.1594
SIP4	1.16
0	1.16024
0	1.16033
SNX3	1.16057
nA	1.16058
MGM1	1.16076
RPL37A	1.16077
NCR1	1.16082
REC102	1.16105
FET5	1.16106
FIT3	1.16113
ALD4	1.16142
PEX17	1.16153
DCN1	1.1616
ADH7	1.16166
0	1.16213
NNK1	1.16215
RPL38	1.16226
IRC24	1.16231
0	1.16294
YEF1	1.16323
TGL3	1.16346
INP51	1.16347
ACF2	1.16358
ALY1	1.1636
FLO10	1.16368
BUD19	1.16369
RPL12A	1.16406
CAF20	1.16411
MYO3	1.16415
URA10	1.16425
0	1.16425
0	1.16432
CSI2	1.16447
0	1.1647
MDJ2	1.16502
URK1	1.16534
TRM82	1.1654
0	1.16554
ZIP2	1.16566
0	1.16584
NIS1	1.16626
OXP1	1.1666
ENT2	1.16717
DAL4	1.16723
0	1.16726
SOL1	1.1674
0	1.16767
SOL2	1.16769
ARI1	1.16776
0	1.16784
BLM10	1.1679
IDP2	1.16796
MUP1	1.16798
PHO91	1.16805
0	1.16829
DSE3	1.16833
SAY1	1.16852
0	1.16857
NCA2	1.16865
0	1.16876
RPL26A	1.16884
MIX17	1.16897
PSO2	1.16911
DPH5	1.16917
0	1.16989
RPL23A	1.16992
BXI1	1.17006
YIP3	1.17012
TED1	1.17013
NFU1	1.17016
MTC2	1.17019
TRM8	1.17029
TVP23	1.17032
HYR1	1.17056
VTC4	1.17069
0	1.17091
FKH2	1.17096
FKS3	1.1712
NHA1	1.17149
HXT10	1.17176
DUR1,2	1.1718
PUF3	1.17181
ALO1	1.17181
THI7	1.17199
APP1	1.17238
0	1.17311
LIA1	1.17327
0	1.17334
PMT6	1.17341
AMN1	1.17351
HNT1	1.1744
RPS14B	1.17486
HEF3	1.17514
HMS1	1.17541
NTC20	1.17547
0	1.1755
0	1.1756
0	1.17567
CUP2	1.17572
UTH1	1.17586
YMC2	1.17655
MNN5	1.17669
RPL41A	1.17672
ICS2	1.177
FAR7	1.17719
SHY1	1.17761
AFR1	1.17775
AIR2	1.17835
SPG3	1.17838
SOK2	1.17849
VHS3	1.17849
ARO8	1.17862
0	1.17878
GAS2	1.17892
0	1.17903
ATG22	1.17904
TDA8	1.17913
GRX6	1.17924
0	1.17927
HOT1	1.17951
TAE1	1.17957
URC2	1.18
APA2	1.18037
0	1.18038
LSM7	1.18051
0	1.18053
0	1.18068
TDA6	1.18093
DIA2	1.18098
SWD1	1.18113
nA	1.18136
MSH5	1.18143
0	1.18153
AFB1	1.18156
0	1.18157
0	1.18158
NAT3	1.18166
PRM2	1.18168
CPS1	1.18174
DRN1	1.18175
0	1.18194
HPF1	1.18195
VPS62	1.18221
PST1	1.18248
RCK1	1.18248
0	1.18265
UBC13	1.18271
0	1.18271
WTM2	1.18284
EDS1	1.18325
HMG2	1.1833
SCP160	1.18354
MTL1	1.18378
PEX14	1.18388
AGE2	1.18412
GDS1	1.18416
0	1.18446
KAP114	1.18451
0	1.18463
DUG2	1.18468
FOX2	1.18504
CTA1	1.18566
FIG2	1.18566
SAE2	1.18588
FIT2	1.18619
YAP6	1.18627
0	1.18631
MIP6	1.18638
BUD25	1.18649
TOP3	1.1869
CHD1	1.18708
RPL11B	1.18709
SNL1	1.18718
0	1.1872
RGT1	1.18727
0	1.18748
0	1.18779
ATP11	1.18788
0	1.18829
RPL27A	1.18842
AST1	1.18843
OXR1	1.18854
HRD1	1.18906
0	1.18927
LYS21	1.18932
EFM4	1.1896
FRA1	1.18976
0	1.18977
OAF3	1.19005
PGM1	1.19006
COQ9	1.19031
0	1.19033
RTA1	1.19049
RPO41	1.19062
RAD57	1.19064
PCL9	1.19086
DNF2	1.19099
FKS1	1.19103
DUS4	1.19128
CYB5	1.19155
0	1.19173
TRF5	1.19181
SAP190	1.19183
0	1.19184
MEI5	1.19201
GSH2	1.19219
0	1.19246
SPO22	1.19278
MBF1	1.19334
0	1.19372
MAK10	1.19379
DYN2	1.19409
EGD2	1.19421
0	1.19432
RTT102	1.19435
0	1.19446
0	1.19478
JHD1	1.19542
RQC1	1.19556
NST1	1.19564
STB4	1.19579
GMC1	1.19594
MRPL38	1.19599
BSC1	1.19612
HIS6	1.19621
YME1	1.19632
0	1.19652
KTR1	1.19656
MAL31	1.19681
0	1.19684
0	1.19699
OTU1	1.19727
BNA5	1.19742
0	1.1976
MSA2	1.1978
CLB1	1.19782
LAP2	1.19804
MRN1	1.19819
LYS14	1.19831
CST6	1.19832
0	1.19833
RCF2	1.19841
CPA1	1.19842
ETT1	1.19854
MGT1	1.19857
SCS22	1.19879
0	1.19884
SYC1	1.19907
RIM11	1.19946
RAD54	1.19965
HST4	1.19983
0	1.19987
NPC2	1.19988
FRE3	1.19991
ERG5	1.20004
NPL4	1.20013
PSP1	1.20023
PPH21	1.20026
ERF2	1.2003
LSM12	1.20031
0	1.2004
STE4	1.20055
SRF1	1.20057
0	1.20063
ECM13	1.20109
GYP8	1.20126
RPS7B	1.20142
0	1.20144
URN1	1.20159
REX3	1.2017
MRPL39	1.20171
BEM3	1.20181
ASN2	1.20189
TCB3	1.20204
0	1.20212
VID30	1.20219
nA	1.20244
CEX1	1.20275
FIG4	1.20278
BSC6	1.20291
SDH1	1.20305
ATE1	1.20306
GSH1	1.2031
ATG8	1.20361
PCL7	1.20383
0	1.20388
CRH1	1.20404
KEX1	1.20413
MBB1	1.20418
SNA3	1.2042
EFM2	1.20423
ERP2	1.20435
THI12	1.20442
ATP18	1.20472
GAL80	1.20482
SIR3	1.20488
0	1.20518
PEX1	1.20561
LSP1	1.20562
CTP1	1.20579
0	1.20694
YRF1-6	1.20696
VEL1	1.20705
MRPL50	1.20705
0	1.20741
PHO86	1.2075
ICL1	1.20763
MSS18	1.20766
PIR3	1.20788
PCA1	1.20794
ELP3	1.20795
KSS1	1.20814
NPP1	1.20818
PRY2	1.20827
HXK1	1.20842
PUS5	1.20857
HSM3	1.2086
0	1.20913
SFC1	1.20914
0	1.20971
0	1.20989
PTC4	1.21
COY1	1.21002
ATS1	1.2101
NRT1	1.21022
VID28	1.21029
TNA1	1.21035
STD1	1.21128
FUB1	1.21148
VAC7	1.21154
RHO2	1.21154
WHI2	1.21162
FMP33	1.21166
0	1.21173
0	1.21178
APS3	1.21198
PNT1	1.21204
DAS2	1.21246
RCR2	1.21255
MLF3	1.2128
PAU5	1.21286
RRT7	1.21307
RPL43B	1.21344
0	1.21345
SMM1	1.21345
0	1.21354
nA	1.21371
UFD4	1.21392
COS1	1.21411
RAD59	1.21415
MFB1	1.21422
HEL1	1.21435
0	1.21448
HXT2	1.21458
HCH1	1.21499
PRM3	1.21509
TRM13	1.21531
MEK1	1.21574
LAT1	1.21574
nA	1.21589
MRX9	1.21606
ARF2	1.21619
DDC1	1.21626
LPX1	1.21665
WHI3	1.2169
0	1.21703
MCH2	1.21722
PXA1	1.21739
0	1.2174
CUE5	1.2175
TRP5	1.21751
PKH2	1.21759
ICS3	1.21767
PSR1	1.21771
0	1.21775
PRP18	1.21784
MRP21	1.21817
DBF20	1.21819
nA	1.21831
GMC1	1.21891
AIM14	1.21901
0	1.21919
CIK1	1.21959
RPS9B	1.21973
0	1.21975
ROG1	1.21988
RPL35B	1.21996
ADE17	1.22045
0	1.22059
VPS53	1.22078
RCN2	1.22127
GIS1	1.22136
CBP1	1.22138
AIM7	1.22142
nA	1.22149
CKA1	1.22155
0	1.22173
SAK1	1.22227
HIS7	1.22267
ATG31	1.22275
RIM101	1.22279
MRP49	1.22289
0	1.22307
GEP3	1.2231
NUP100	1.22315
SEC66	1.22367
TUL1	1.22369
0	1.22389
RAD33	1.22406
IBD2	1.22435
SYH1	1.22453
RTR1	1.22462
DSE1	1.22476
FYV5	1.22478
FRE4	1.22509
0	1.22521
MND2	1.22564
0	1.22574
AIM32	1.22578
FAR8	1.22584
0	1.2259
0	1.22592
YEL1	1.22618
0	1.22627
0	1.22672
MSH6	1.22698
LCL3	1.22727
GRX3	1.22749
RIM20	1.22753
DUR3	1.2279
YDC1	1.22814
FUN26	1.22818
ARL1	1.2283
SPT2	1.22838
MTO1	1.22838
IRC5	1.22859
KXD1	1.22862
ERG4	1.22879
AGE1	1.22881
CYC7	1.22881
SER3	1.22887
YBT1	1.229
PES4	1.2291
SUT1	1.22932
0	1.22934
nA	1.22941
MDH2	1.22944
ERP6	1.22948
0	1.22968
CNA1	1.22972
YPT6	1.22986
ATP4	1.23017
LCL2	1.23032
SNA4	1.23045
TIS11	1.23062
TDH3	1.23076
0	1.23077
0	1.23088
BMH2	1.23098
UBP8	1.23102
ENV11	1.23121
PEX3	1.23141
0	1.23165
VNX1	1.23173
YPT11	1.23216
SHH4	1.2323
ITR1	1.23252
CHA4	1.23258
CSM4	1.23278
0	1.23314
0	1.23329
TRM12	1.2341
UBX7	1.23421
SCS2	1.23462
RPL16B	1.2347
0	1.23475
WWM1	1.23486
SKN1	1.23495
PRY1	1.23503
0	1.23525
HO	1.23532
PEX8	1.23549
0	1.23554
UGA4	1.23572
0	1.23581
IES4	1.23635
RMA1	1.2364
UME1	1.23656
STE2	1.23661
GAL83	1.23691
ALK1	1.23696
0	1.23717
MET32	1.23728
nA	1.23736
ENV9	1.23742
TOD6	1.23746
IRC20	1.23746
ETR1	1.23788
TYR1	1.23792
PPH22	1.2385
LOC1	1.23851
0	1.23853
ERG6	1.23864
PFA4	1.23868
ATG14	1.23891
SRP40	1.23911
ATX1	1.23912
0	1.23912
SGN1	1.23924
MUD2	1.23975
COX17	1.23986
RPL19A	1.23987
TMN3	1.23989
HSV2	1.24002
0	1.24003
0	1.24021
BOI2	1.24025
BFR1	1.24029
0	1.24041
PTK1	1.24104
HUA2	1.24109
VTH1	1.2413
GCN20	1.24132
VTS1	1.24148
ENO1	1.2415
0	1.24187
IZH1	1.24215
ECT1	1.24229
LEU4	1.24232
PRM15	1.24267
CLU1	1.2428
TAN1	1.24284
FRK1	1.24289
0	1.24295
PRY3	1.24301
LRO1	1.24302
KRE1	1.24309
SSE2	1.24318
KEL2	1.24324
0	1.24328
ROG3	1.24355
PUF4	1.24368
YLF2	1.24377
SNG1	1.2443
0	1.24444
AGP2	1.24462
SYS1	1.24485
PTM1	1.24496
VPS63	1.24518
SYM1	1.24521
APE3	1.24531
PMT7	1.24538
MEH1	1.24543
DBR1	1.24544
SNC2	1.24579
EIS1	1.24582
TVP15	1.24592
DIG2	1.24625
0	1.24633
0	1.24657
GDE1	1.24658
UBX4	1.24706
ROX1	1.24717
SWI3	1.24718
CIT2	1.2472
CPR4	1.24756
HPC2	1.2476
0	1.2477
MPH1	1.24777
0	1.24781
nA	1.24783
0	1.24793
SSP2	1.24796
STB1	1.24813
0	1.2483
IME2	1.24847
DAS1	1.24851
UPF3	1.24864
CPS1	1.24865
0	1.24888
FUN14	1.24943
0	1.24944
ARX1	1.24959
SFA1	1.24975
SWS2	1.24985
RFX1	1.24987
SPL2	1.25002
IRS4	1.25003
RSM28	1.25035
0	1.25047
0	1.25063
DFG10	1.2508
NTE1	1.25087
OYE3	1.2509
XKS1	1.25091
COG5	1.25095
SHE2	1.251
PMP1	1.25111
YSY6	1.25141
RAX2	1.25142
AFG1	1.25181
0	1.25191
AAT1	1.252
GIP1	1.25203
KAR5	1.25205
CTT1	1.25212
SNO2	1.25221
PMS1	1.25237
BNA4	1.25239
0	1.25266
YPT10	1.25279
ALG8	1.25292
0	1.25293
PMU1	1.25307
RSF1	1.2532
0	1.25339
ORM2	1.25374
MAL13	1.25413
RKM4	1.25418
0	1.25426
CIT1	1.25428
PPM2	1.25429
CTK3	1.25429
TMC1	1.25464
0	1.25469
DIA3	1.25475
0	1.25478
RNH203	1.25488
nA	1.25494
ACK1	1.25499
YSP1	1.25507
SKI8	1.25513
POL4	1.25515
RPN14	1.25521
CPR1	1.2555
UTR4	1.25621
GLG1	1.25621
KTR2	1.25641
SAS3	1.25678
HIR2	1.25687
RRG8	1.25732
ARO9	1.25734
WSC4	1.25749
PSY4	1.25759
GLO4	1.2577
PRR1	1.25788
0	1.25793
MTG1	1.25798
HST3	1.25811
0	1.25839
PGD1	1.25839
MGA2	1.25844
GPX2	1.2588
0	1.25883
SIT1	1.25961
PTP3	1.25969
RPS18B	1.25981
PCL2	1.25984
CTO1	1.26013
RGD2	1.2603
ERP5	1.2603
RLM1	1.26033
0	1.26058
DER1	1.26072
RPL43A	1.26085
AKR2	1.26103
HOS2	1.26141
ERP4	1.26156
COX5A	1.26156
KAP120	1.26175
SAF1	1.2618
PHO23	1.26215
0	1.2623
NIT1	1.26241
EDC1	1.26263
0	1.26265
PBS2	1.26272
NOP6	1.26273
SWP82	1.26275
HSP12	1.26348
0	1.26356
DBP1	1.26368
FAR10	1.2638
FMP30	1.26412
PHO90	1.26426
SFG1	1.26453
0	1.2654
0	1.26545
0	1.26568
TWF1	1.26572
0	1.26583
BYE1	1.26583
SRY1	1.26591
SFP1	1.26594
0	1.26598
ASF2	1.26601
JEM1	1.26611
DPH6	1.26613
AFT2	1.26636
PET127	1.2666
DSE2	1.26663
RIM15	1.26672
0	1.26692
AIM34	1.26702
CCH1	1.26704
ARA1	1.26711
MSC6	1.26721
LEO1	1.26727
GVP36	1.26736
RBK1	1.26739
ASN1	1.2674
0	1.26744
GAC1	1.26755
STE5	1.26757
0	1.2676
LYS5	1.26797
APM2	1.26797
0	1.26812
0	1.26884
GLO1	1.26928
BUR2	1.26948
CAF16	1.26948
DNL4	1.26952
0	1.26955
ITC1	1.26961
XBP1	1.26972
0	1.2698
MRP13	1.26986
MSH4	1.27022
IMH1	1.27046
NBP2	1.27047
RXT2	1.2705
RRT1	1.27081
0	1.27097
SLY41	1.27103
VPS17	1.27122
MRPS28	1.27134
0	1.2714
VHR1	1.27144
SLX8	1.27158
RPP2A	1.27163
CLB2	1.27169
ACO2	1.27179
0	1.27195
SNF3	1.27196
0	1.27197
HPA3	1.27198
CTK2	1.27232
MBP1	1.2726
DEF1	1.27263
PEX25	1.27273
TOS3	1.27278
0	1.27279
COX15	1.27333
0	1.27335
SIR1	1.27342
DAL2	1.27351
BAS1	1.27357
MSC2	1.27373
SPO71	1.27383
nA	1.27396
CSH1	1.27424
CBP3	1.27453
FYV10	1.27492
RSB1	1.27498
IMA5	1.2754
YNG1	1.27549
SRT1	1.27565
TMS1	1.27584
INA1	1.27604
OGG1	1.27626
MKK2	1.27646
0	1.27646
TSR3	1.27647
ESBP6	1.27659
0	1.27659
SAM2	1.27685
PRM9	1.27685
PNS1	1.27687
0	1.27708
RPL24B	1.27717
0	1.27719
0	1.27726
CUE2	1.27726
0	1.27741
0	1.27774
HOT13	1.27785
0	1.27796
MAL12	1.27845
DEP1	1.27848
SPS19	1.27865
0	1.27865
MMR1	1.27867
HMT1	1.27886
SUN4	1.27905
PBP4	1.27974
PEX32	1.27974
0	1.27974
ANS1	1.28009
RAD7	1.28013
0	1.28019
GID8	1.28052
LIP5	1.28055
SIT4	1.28062
RAD28	1.28076
LDS1	1.2808
OSW7	1.28089
BTS1	1.2809
0	1.2809
SPG5	1.28091
0	1.28115
0	1.28118
[truncated: 2,678 more rows]
