# Supplementary figures and images for: ESCRTs function directly on the lysosome membrane to downregulate ubiquitinated lysosomal membrane proteins
Source: eLife journal article supplement (doi:10.7554/elife.26403), 2017-06-29

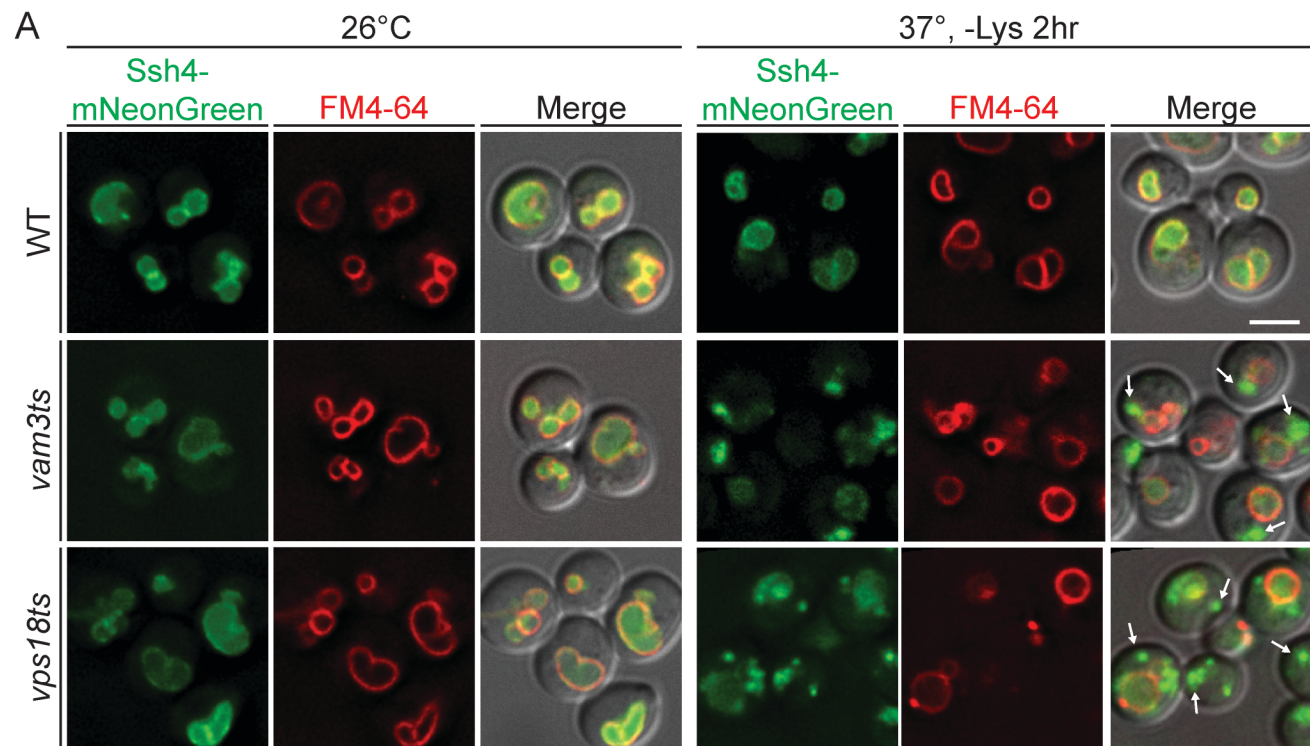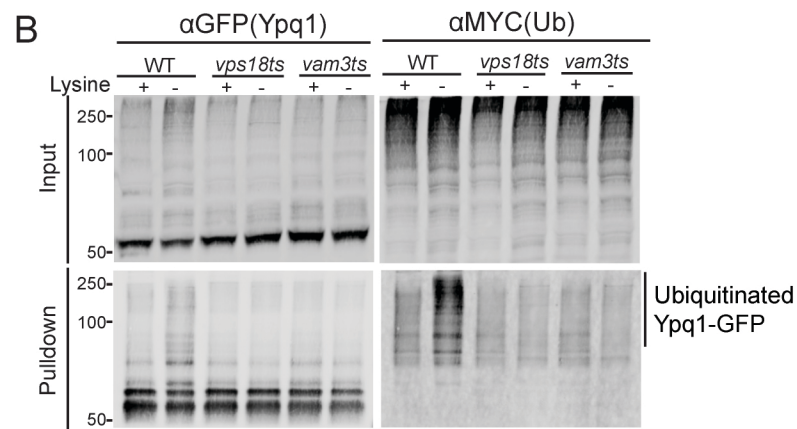

Figure 2-figure supplemental 1

Supplement: supp [file elife_poa_e26403_Figure_2_figure_supplement_1.pdf › elife_poa_e26403_Figure_2_figure_supplement_1.pdf]

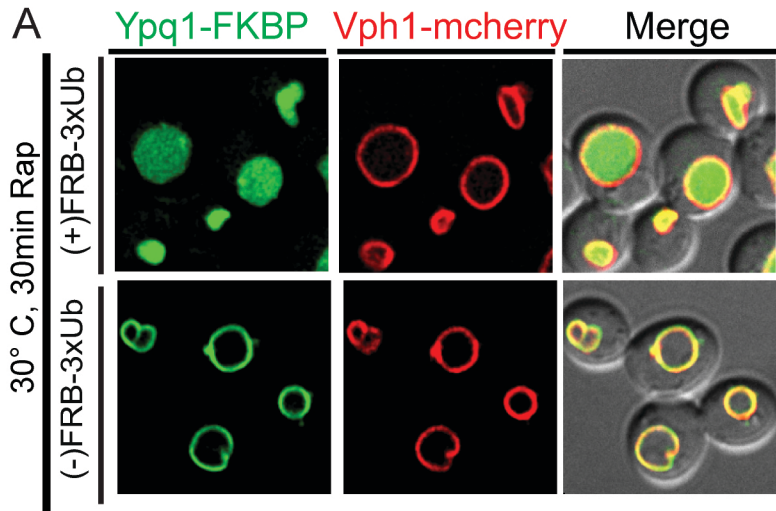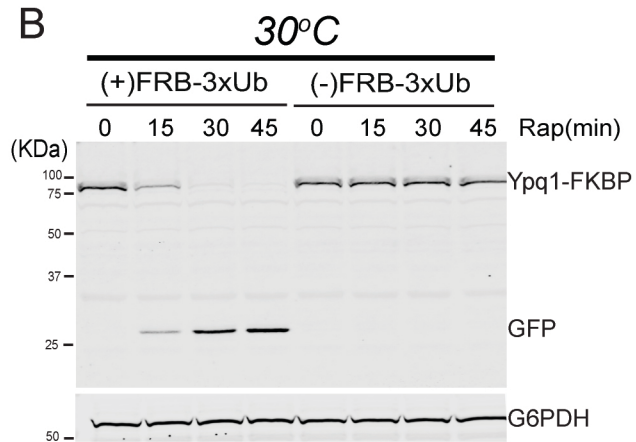

Supplement: supp [file elife_poa_e26403_Figure_2_figure_supplement_2.pdf › elife_poa_e26403_Figure_2_figure_supplement_2.pdf]

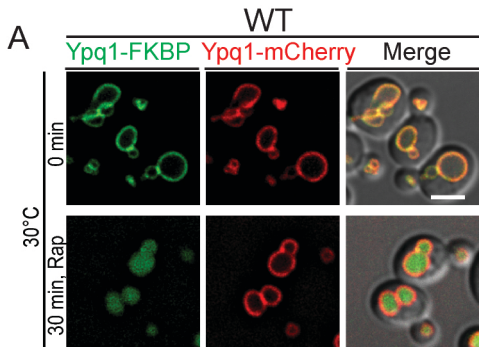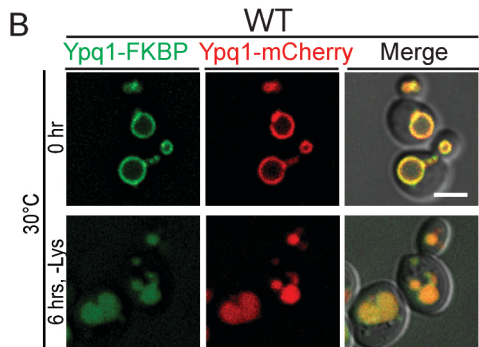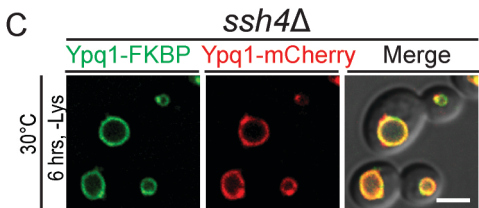

Supplement: supp [file elife_poa_e26403_Figure_2_figure_supplement_3.pdf › elife_poa_e26403_Figure_2_figure_supplement_3.pdf]

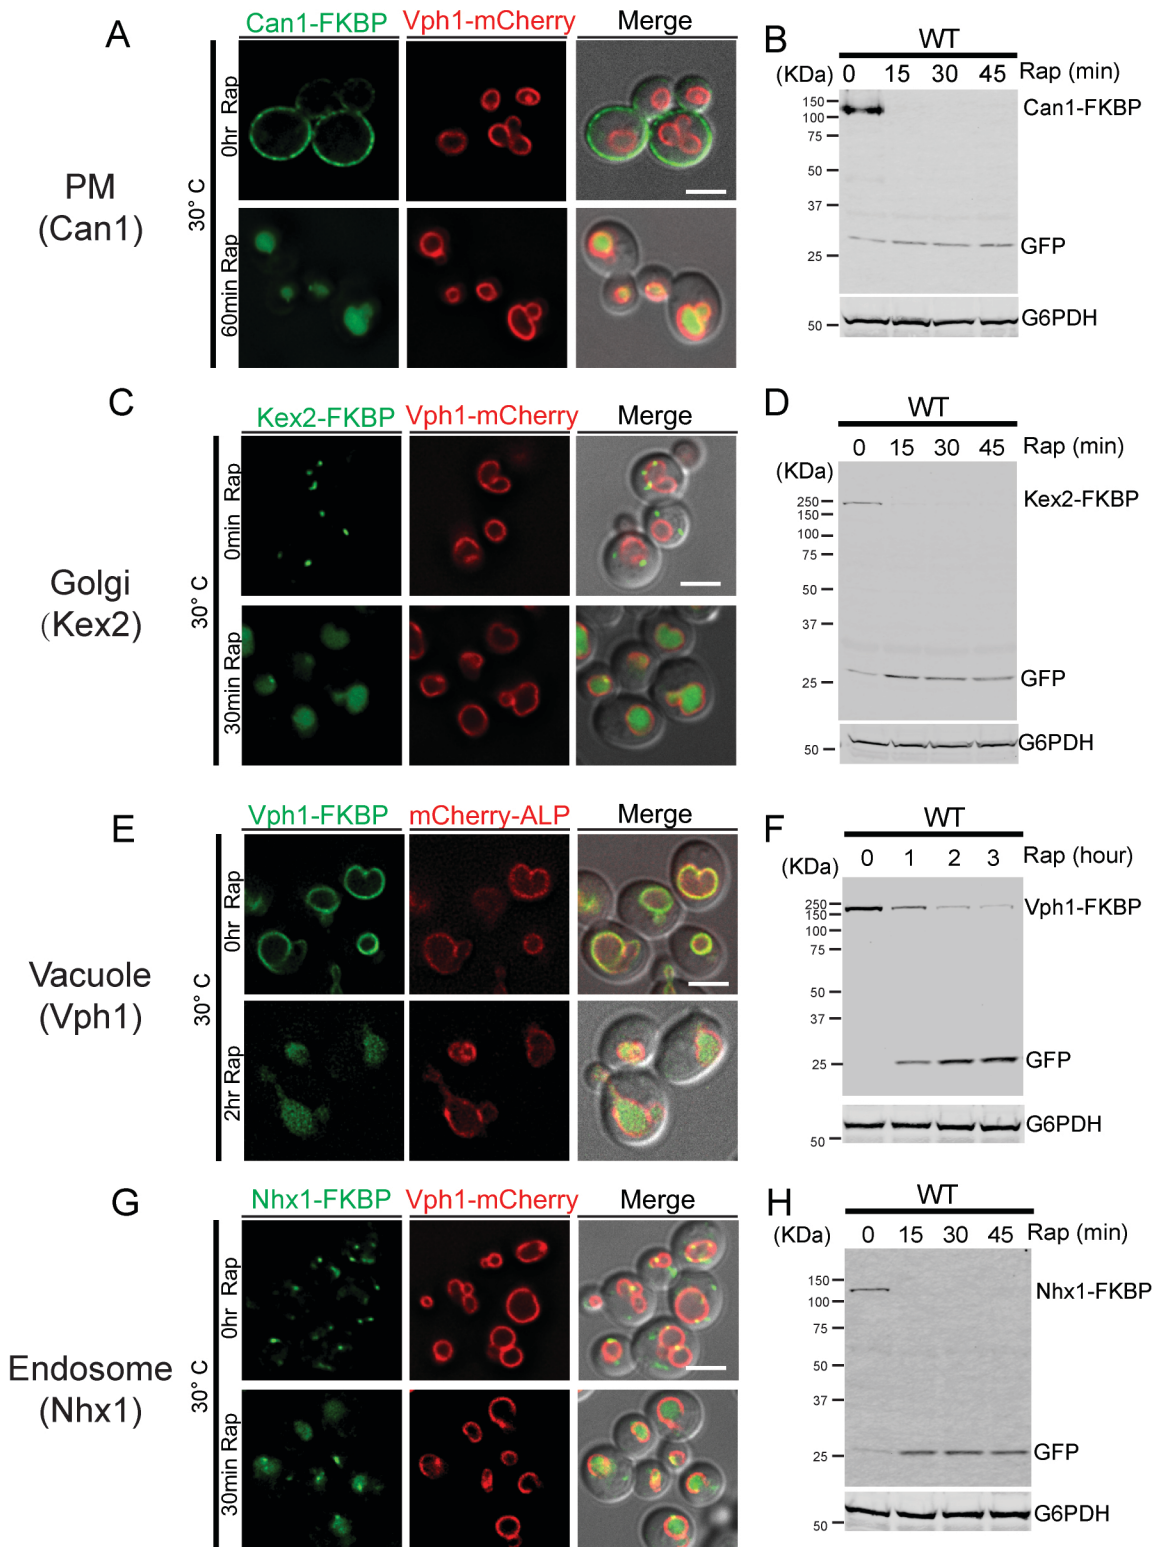

Supplement: supp [file elife_poa_e26403_Figure_2_figure_supplement_4.pdf › elife_poa_e26403_Figure_2_figure_supplement_4.pdf]

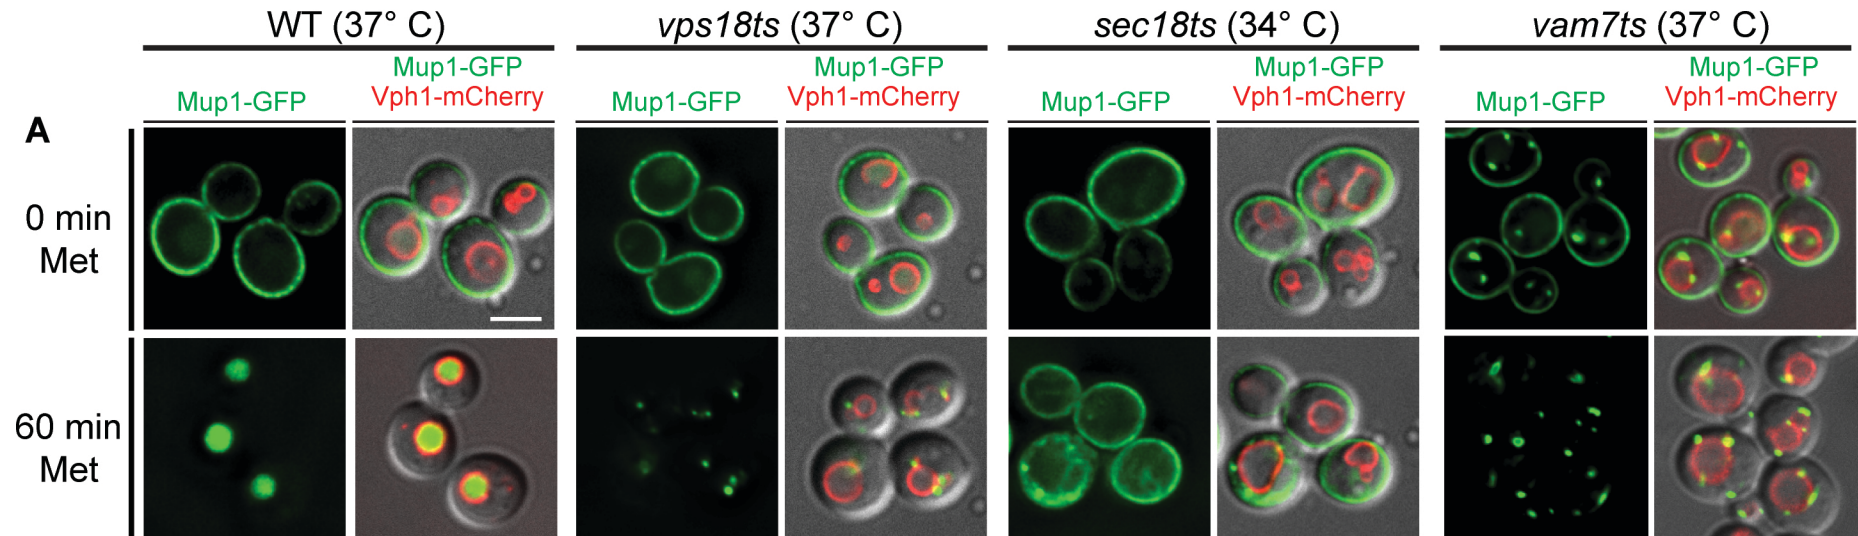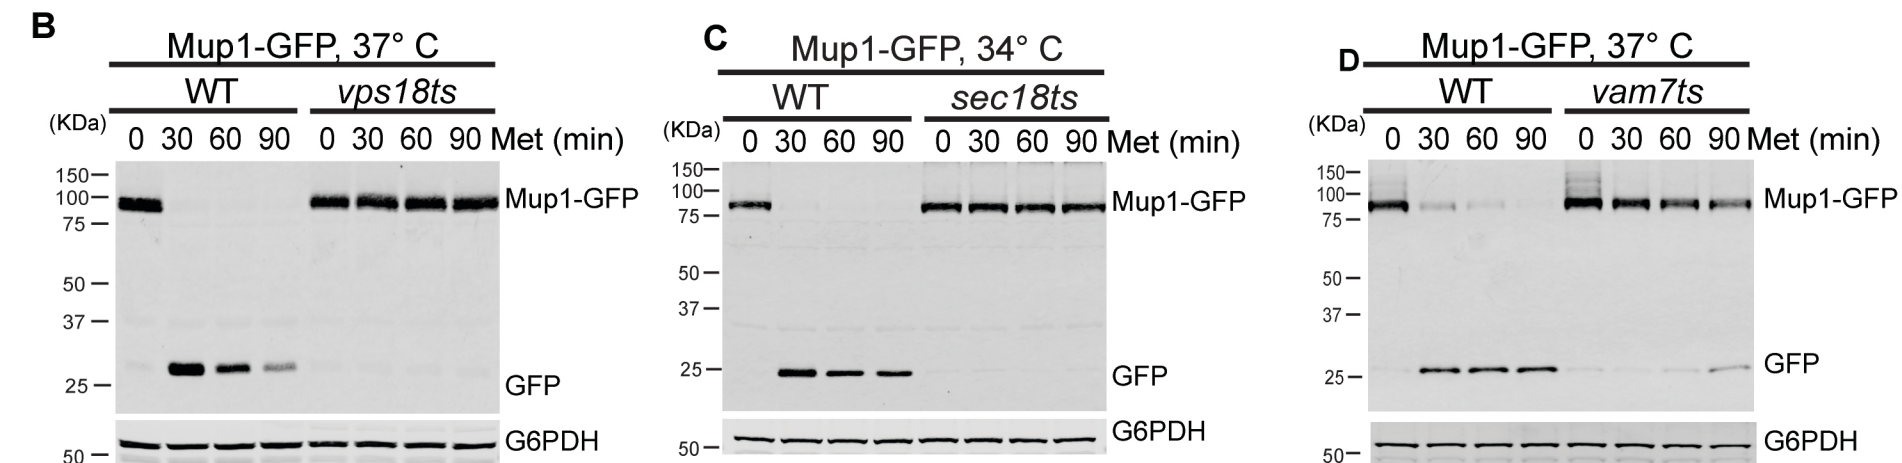

Supplement: supp [file elife_poa_e26403_Figure_3_figure_supplement_1.pdf › elife_poa_e26403_Figure_3_figure_supplement_1.pdf]

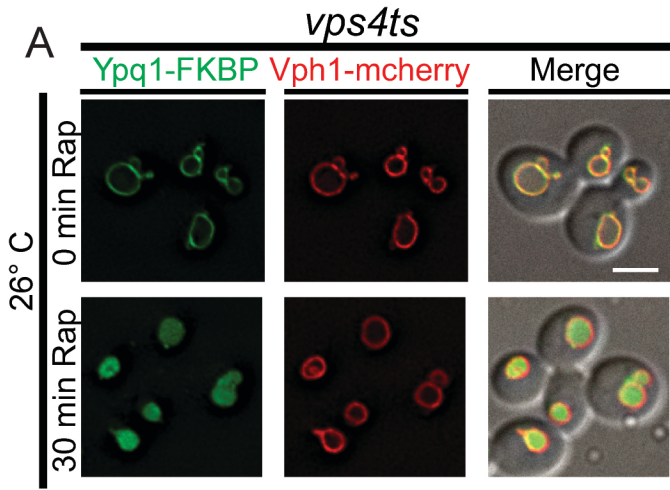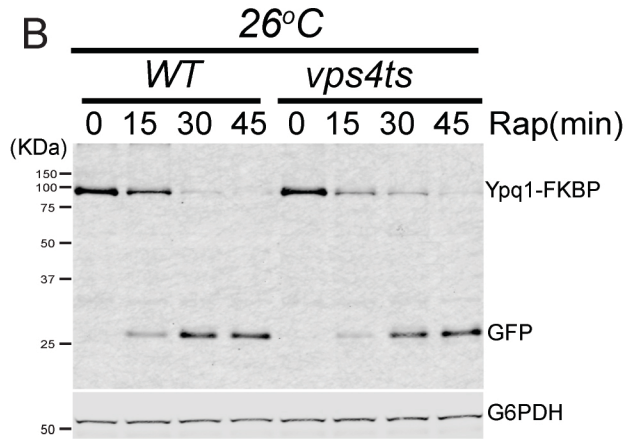

Supplement: supp [file elife_poa_e26403_Figure_4_figure_supplement_1.pdf › elife_poa_e26403_Figure_4_figure_supplement_1.pdf]

Ypq1-FKBP

Vps36-mCherry

Merge

No treatment

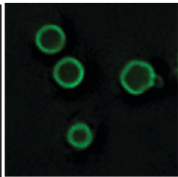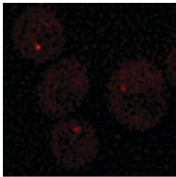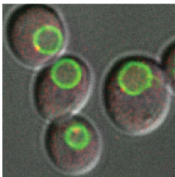NaN<sub>3</sub>/NaF  
Rap, 15min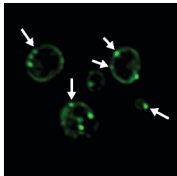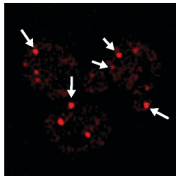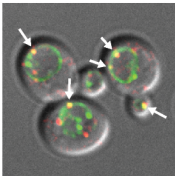

Supplement: supp [file elife_poa_e26403_Figure_6_figure_supplement_1.pdf › elife_poa_e26403_Figure_6_figure_supplement_1.pdf]

Ypq1-FKBP Vps23-mCherry Merge

No treatment

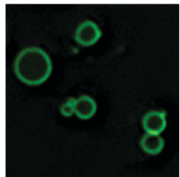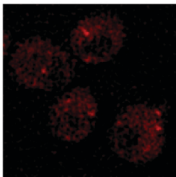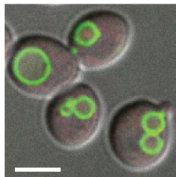

NaN<sub>3</sub>/NaF, 15min

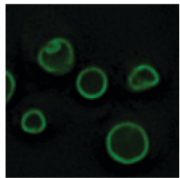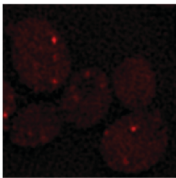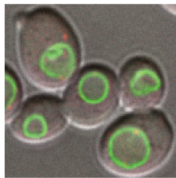

Rap, 15min

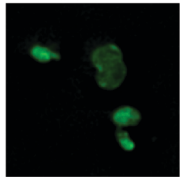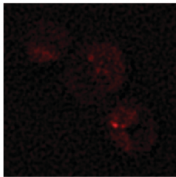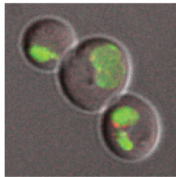

Supplement: supp [file elife_poa_e26403_Figure_6_figure_supplement_2.pdf › elife_poa_e26403_Figure_6_figure_supplement_2.pdf]

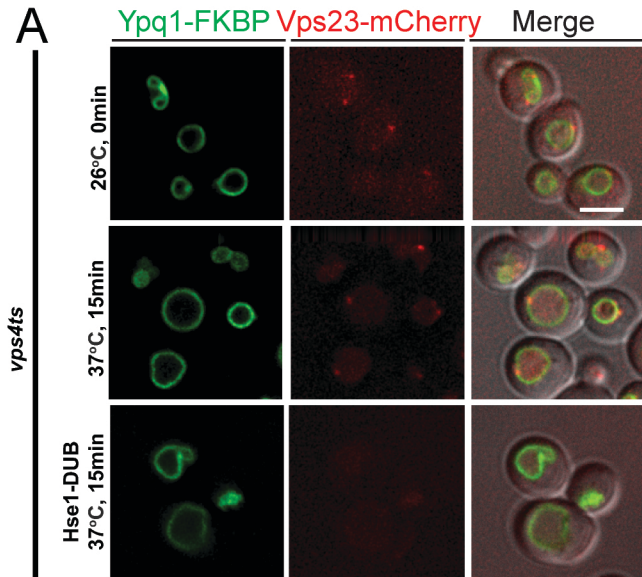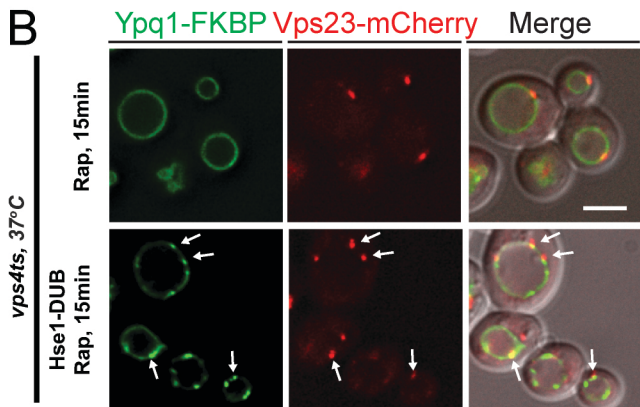

Supplement: supp [file elife_poa_e26403_Figure_6_figure_supplement_3.pdf › elife_poa_e26403_Figure_6_figure_supplement_3.pdf]
